# Supplementary material for: Effectiveness of osteopathic manipulative treatment in neonatal intensive care units: protocol for a multicentre randomised clinical trial
Source: PubMed Central journal article supplement — BMJ Open. 2013 Feb 20;3(2):e002187. doi: 10.1136/bmjopen-2012-002187 (PMC3586056; doi:10.1136/bmjopen-2012-002187), 2013-02-20
Supplement: bmjopen-2012-002187.draft_revisions.pdf [file bmjopen-2012-002187.draft_revisions.pdf]

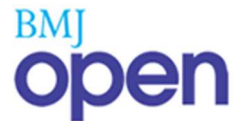

**EFFICACY OF OSTEOPATHIC MANIPULATIVE TREATMENT IN  
NEONATAL INTENSIVE CARE UNITS: A MULTICENTRE  
RANDOMIZED CLINICAL TRIAL**

|                                 |                                                                                                                                                                                                                                                                                                                                                                                                                                                                                                                                                                                                                                                   |
|---------------------------------|---------------------------------------------------------------------------------------------------------------------------------------------------------------------------------------------------------------------------------------------------------------------------------------------------------------------------------------------------------------------------------------------------------------------------------------------------------------------------------------------------------------------------------------------------------------------------------------------------------------------------------------------------|
| Journal:                        | <i>BMJ Open</i>                                                                                                                                                                                                                                                                                                                                                                                                                                                                                                                                                                                                                                   |
| Manuscript ID:                  | bmjopen-2012-002187                                                                                                                                                                                                                                                                                                                                                                                                                                                                                                                                                                                                                               |
| Article Type:                   | Protocol                                                                                                                                                                                                                                                                                                                                                                                                                                                                                                                                                                                                                                          |
| Date Submitted by the Author:   | 17-Oct-2012                                                                                                                                                                                                                                                                                                                                                                                                                                                                                                                                                                                                                                       |
| Complete List of Authors:       | Cerritelli, Francesco; European Institute for Evidence Based Osteopathic Medicine, Research and Development<br>Pizzolorusso, Gianfranco; Accademia Italiana Osteopatia Tradizionale, Post-doc Education<br>Renzetti, Cinzia; Accademia Italiana Osteopatia Tradizionale, Education<br>D'Incecco, Carmine; Pescara's Hospital, Neonatal Intensive Care Unit<br>Fusilli, Paola; Pescara's Hospital, Neonatal Intensive Care Unit<br>Perri, Paolo; Macerata's hospital, Neonatal Intensive Care Unit<br>Tubaldi, Lucia; Macerata's hospital, Neonatal Intensive Care Unit<br>Barlafante, Gina; Accademia Italiana Osteopatia Tradizionale, Education |
| <b>Primary Subject Heading</b>: | Complementary medicine                                                                                                                                                                                                                                                                                                                                                                                                                                                                                                                                                                                                                            |
| Secondary Subject Heading:      | Paediatrics, Evidence based practice                                                                                                                                                                                                                                                                                                                                                                                                                                                                                                                                                                                                              |
| Keywords:                       | COMPLEMENTARY MEDICINE, PAEDIATRICS, PREVENTIVE MEDICINE                                                                                                                                                                                                                                                                                                                                                                                                                                                                                                                                                                                          |
|                                 |                                                                                                                                                                                                                                                                                                                                                                                                                                                                                                                                                                                                                                                   |

SCHOLARONE™  
Manuscripts

only

1  
2  
3  
4  
5  
6  
7  
8  
9  
10  
11  
12  
13  
14  
15  
16  
17  
18  
19  
20  
21  
22  
23  
24  
25  
26  
27  
28  
29  
30  
31  
32  
33  
34  
35  
36  
37  
38  
39  
40  
41  
42  
43  
44  
45  
46  
47  
48  
49  
50  
51  
52  
53  
54  
55  
56  
57  
58  
59  
60

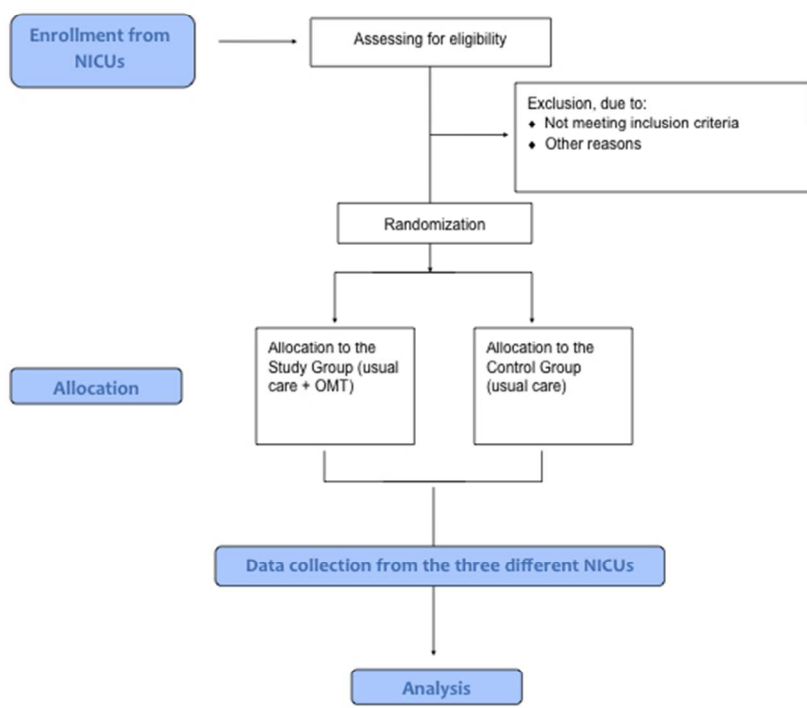

Figure 1. Flow chart describing recruitment, randomization, data collection and analysis of the study.

Flow chart describing recruitment, randomisation, data collection and analysis of the study.  
215x279mm (72 x 72 DPI)

## STUDY PROTOCOL

### EFFICACY OF OSTEOPATHIC MANIPULATIVE TREATMENT IN NEONATAL INTENSIVE CARE UNITS: A MULTICENTRE RANDOMIZED CLINICAL TRIAL

Cerritelli F<sup>1,2</sup>, Pizzolorusso G<sup>1,2</sup>, Renzetti C<sup>2</sup>, D’Incecco C<sup>3</sup>, Fusilli P<sup>3</sup>, Perri FP<sup>4</sup>, Tubaldi L<sup>4</sup>, Barlafante G<sup>1,2</sup>

1 EBOM – European Institute for Evidence Based Osteopathic Medicine, Chieti, Italy

2 AIOT – Accademia Italiana Osteopatia Tradizionale, Pescara, Italy.

3 Neonatal Intensive Care Unit - “Spirito Santo” Civil Hospital, Pescara, Italy.

4 Neonatal Intensive Care Unit - Macerata Public Hospital

Corresponding author:

Francesco Cerritelli

Via Prati, 29 - 65124 Pescara (Italy)

tel +39 339 4332801 fax +39 085 4172587

[francesco.cerritelli@ebom.it](mailto:francesco.cerritelli@ebom.it)

## ABSTRACT

### Introduction

Neonatal care has been considered one of the first priorities for improving quality of life in children. In 2010 the 10% of babies were born prematurely influencing national health care policies, economic action plans and political decisions. The use of complementary medicine has been applied to the care of newborns. One previous study documented the positive effect of osteopathic manipulative treatment (OMT) in reducing newborns' length of stay (LOS).

**Objective:** Aim of this study is to examine the association between OMT and LOS across three NICUs.

**Design:** multicentre randomized control trial

### Methods

**Participants:** 690 preterm infants will be allocated into two groups, using permuted-block randomization. Outcome assessors will be blinded of study design and group allocation.

**Setting:** primary care. Patients will be recruited from three secondary and tertiary NICUs from north and central Italy

**Interventions:** The two groups will receive standard medical care and OMT will be applied, twice a week, to the experimental group only.

**Outcomes:** The primary outcome is the mean difference in days between discharge and entry. Secondary outcomes are difference in daily weight gain, number of episodes of vomit, regurgitation, stooling, use of enema, time to full enteral feeding and NICU costs.

### Conclusions

The scope is to estimate the effect of OMT across different centers, proving generalizability on the effectiveness of osteopathy in NICUs, leading to enhanced quality of health service delivered and cost reductions.

### Ethics and dissemination

Written informed consent will be obtained from parents or legal guardians at study enrollment. The trial has been approved by the ethical committee of Macerata hospital (n°22/int./CEI/27239) and it is under review by the other regional ethics committees. Results from this trial will be disseminated through scientific medical journals and conferences.

### Trial registration number

This trial has been registered at [www.clinicaltrials.org](http://www.clinicaltrials.org) (identifier NCT01645137).

1  
2 Article summary  
3

4 Article focus

- 5 • Osteopathic treatment as a complementary and coadjuvant therapy in NICU  
6 • Effectiveness of osteopathic procedures in reducing the newborns' LOS  
7 • Osteopathy as a means to reduce NICU costs  
8  
9

10 Key messages

- 11 • Beneficial effects of osteopathic treatment on newborns health  
12 • Cost-effectiveness of osteopathic procedures in NICU settings  
13  
14

15 Strengths and limitations of the study

- 16 • Robust study design based on multicentre nationwide randomized control trial  
17 • Single blinding  
18  
19  
20  
21  
22  
23  
24  
25  
26  
27  
28  
29  
30  
31  
32  
33  
34  
35  
36  
37  
38  
39  
40  
41  
42  
43  
44  
45  
46  
47  
48  
49  
50  
51  
52  
53  
54  
55  
56  
57  
58  
59  
60

## INTRODUCTION

Neonatal care has been one of the major focuses of the global health system policies, in terms of services delivered, to reduce neonatal mortality and morbidity. The last report of the WHO showed that more than 1 in 10 infants are born prematurely, resulting in 15 million premature infants worldwide in 2010<sup>1</sup>. In spite of expensive NICUs, structural changes in the health care system have led to evidence-based guidelines that reduce preterm infants hospitalization and deaths. A large rate of US pediatric hospital stays is secondary to neonatal conditions that rank among the most expensive items in the list of services provided for children<sup>2</sup>. The average cost per infant is highest for preterm newborns with gestational age (GA) between 24-31 weeks, and next highest for those between 32-36 weeks, as opposed to the general population<sup>3</sup>. Costs per surviving infant generally decrease with increasing GA. In the United States, preterm/LBW infants account for half the hospitalization costs of all newborns and one quarter of overall pediatric costs<sup>4</sup>.

Length of stay (LOS) in neonatal intensive care units (NICUs) is strongly associated with GA and birth weight<sup>5</sup>. Infants delivered at the earliest GA have the longest hospital stays, partly because of the higher incidence of medical complications in very low birth weight (VLBW) infants.

However, compared to term infants, premature infants are unique in their need to attain not only medical stability but also physiologic maturity, including adequate temperature control, cessation of apnea and bradycardia, and adequate feeding behavior, before they are safely discharged to home<sup>6,7</sup>.

Patterns of hospitalization of preterm infants are also associated with the presence of clinical symptoms of abnormal gastrointestinal function such as vomit, regurgitation, gastric residuals and functional constipation<sup>8-10</sup>.

Osteopathy is a form of drug-free non-invasive manual medicine, designated as complementary and alternative medicine (CAM). It relies on manual contact for diagnosis and treatment<sup>11</sup>. It respects the relationship of body, mind and spirit in health and disease; it lays emphasis on the structural and functional integrity of the body and the body's intrinsic tendency for self-healing. Osteopathic practitioners use a wide variety of therapeutic manual techniques to improve physiological function and/or support homeostasis that has been altered by somatic (body framework) dysfunction (ICD-10-CM Diagnosis Code M99.00-09), i.e. impaired or altered function of related components of the somatic system; skeletal, arthrodiagonal and myofascial structures; and related vascular, lymphatic, and neural elements<sup>12</sup>. Osteopathic practitioners use their understanding of the relationship between structure and function to optimize the body's self-regulating, self-healing capabilities. This holistic approach to patient care and healing is based on the concept that a human being is a dynamic functional unit, in which all parts are interrelated and which possesses its own self-regulatory and self-healing mechanisms. Two essential components of osteopathic health care are the structural evaluation of the patient for diagnosis and an array of manipulative techniques for treatment<sup>11</sup>.

Aim of the structural examination is to locate somatic dysfunctions, while the array of manipulative techniques are used to relieve tissues tensions, improve blood flow and lymphatic drainage.

Although several studies document the effect of osteopathic manipulative treatment (OMT) in a population of pediatric patients<sup>13-15</sup>, the medical literature lacks information about any

1  
2 potential benefits of the use of OMT in preterm infants. The only study published  
3 demonstrated a potential positive effect of OMT in reducing the likelihood of excessive  
4 LOS and gastro-intestinal symptoms<sup>16</sup>.  
5

6  
7 Aim of this multicentre RCT is to translate the above clinical observations in the light of the  
8 evidence based approach and in a larger population.  
9

10  
11  
12  
13  
14  
15  
16  
17  
18  
19  
20  
21  
22  
23  
24  
25  
26  
27  
28  
29  
30  
31  
32  
33  
34  
35  
36  
37  
38  
39  
40  
41  
42  
43  
44  
45  
46  
47  
48  
49  
50  
51  
52  
53  
54  
55  
56  
57  
58  
59  
60

For peer review only

## METHODS AND ANALYSIS

### Aim of the study

Primary endpoint is to evaluate the effectiveness of OMT in reducing LOS in a sample of premature infants.

Secondary endpoint of the study is to evaluate the difference in daily weight gain, number of episodes of vomit and regurgitation, stooling, use of enema, time to full enteral feeding (nipple and/or bottle) and NICU costs.

### Study type

Interventional, multicentre nationwide single blinded randomized control trial.

### Population

Study population is all preterm infants entering the NICUs in the period between July 2012 and July 2013.

Preterm infants entering the trial will receive routine medical care plus osteopathic evaluation and treatment (figure 1).

### Participating NICUs

Patients will be recruited from three Italian secondary and tertiary NICUs at the public hospital in Pescara, Macerata and Monza.

The three participating NICUs are located throughout Italy in urban regions with catchment areas of about 40 000 to 150 000 inhabitants. Principal investigators of the participating NICUs are neonatologists and osteopaths with at least 5 years in neonatal care.

### Inclusion/Exclusion criteria

All patients entering the NICU are eligible to be enrolled in the trial, except those presenting the following clinical conditions (exclusion criteria):

- Gestational age <29 weeks
- Gestational age >37 weeks
- First OMT performed after 14 days from birth
- genetic disorders
- congenital disorders
- cardiovascular abnormalities
- proven or suspected necrotized enterocolitis with or without gastrointestinal perforation
- proven or suspected abdominal obstruction
- pre/post surgery patients
- pneumoperitoneum
- atelectasis
- Newborn from an HIV seropositive/drug addicted mother
- respiratory disorders
- transferred to/from other hospital
- admitted for preterminal comfort care (defined as neither intubation nor cardio-respiratory resuscitation)



## Randomization process

All patients entering the study are sequentially allocated to the experimental and control arms using R software as computer random number generator<sup>17</sup>.

The type of randomization procedure is permuted-block (ratio 1:1).

The process of randomization is performed in the coordinating center.

## Research investigators

Investigators will be grouped into three groups:

1. “consultant performing the randomization”
2. “osteopaths performing the evaluation”
3. “osteopaths performing the evaluation&treatment”

### *Consultant performing the randomization*

An information technology consultant will be responsible for randomization prior to the arrival of the osteopaths to the NICU.

### *Osteopaths performing the evaluation*

Osteopaths in this group will perform the osteopathic evaluation in all infants entering the trial, with no knowledge about patients allocation.

The osteopathic evaluation will be performed in the absence of the “osteopaths performing the evaluation&treatment”.

### *Osteopaths performing the evaluation&treatment*

“Osteopaths performing the evaluation&treatment” will perform an osteopathic evaluation and treatment of preterm infants from group “A”.

## Intervention provided into the trial

Patients from experimental and control groups will receive routine medical care.

After study enrollment, all patients are sampled in group A and group B.

1. Group A (OMT): patients under usual medical care plus osteopathic treatment.

Patients from this group will receive osteopathic care as follows: two treatments weekly for the entire length of stay in the unit. Patients from group A will also receive an osteopathic evaluation from the “osteopaths performing the evaluation”.

Osteopathic treatments will only be applied to patients from group A and will be performed only by the “osteopaths performing the evaluation&treatment”, not involved in the study design, data entry, statistical analysis.

Each OMT sessions involve the structural examination and specific manipulative procedures.

In newborns the structural exam is usually performed with the child lying down in the open crib or incubator. Diagnostic criteria for somatic dysfunction are focused on tissue texture abnormalities, areas of asymmetry and misalignment of bony landmarks and the quality of motion, its balance and organization.

1  
2 The second part of the OMT session is characterized by the use of a variety of therapeutic  
3 manual techniques, addressed to increase range of motion and resolve the somatic  
4 dysfunctions diagnosed.

5 Techniques to be used are in line with the benchmarks for osteopathic treatment available in  
6 the medical literature and are limited to myofascial release, balanced  
7 ligamentous/membranous tension, indirect fluidic and v-spread.  
8

9  
10 2. Group B (No OMT): control group.

11 Following the same schedule as group A, patients from group B will receive usual medical  
12 care and osteopathic evaluation only.  
13

14 Osteopathic service will be provided twice a week, on Tuesdays and Fridays.  
15

### 16 17 18 **Allocation concealment and blinding**

19 NICU staff are unaware of study design and outcomes.

20 NICU staff are blinded to patients allocation, since all infants will be touched by osteopaths  
21 from group A and B  
22  
23

### 24 **Data entering and data export**

25 Data collection will be performed using an ad hoc locally developed software called  
26 EBOM-GCCN.  
27

28 EBOM-GCCN data set is an informatics tool that improves the efficiency and accuracy of  
29 data and has been developed to assist neonatologists, nurses and osteopaths in daily patients  
30 management.  
31  
32

33 The software consists of three sections:

- 34 - Section 1: Intended for use by neonatologists and nurses for recording patients' general  
35 details and all clinical information;
- 36 - Section 2: Intended for use by “*osteopaths performing the evaluation&treatment*”;
- 37 - Section 3: Intended for use by “*osteopaths performing the evaluation*”.

38 Records in section 1, 2 and 3 are exclusively and respectively accessible to NICU staff,  
39 “*osteopaths performing the evaluation&treatment*” and “*osteopaths performing the*  
40 *evaluation*”.  
41

42 Nursing and medical records will be collected daily by the NICU staff, from the time the  
43 infants enters the unit to the time of discharge.  
44

45 Osteopathic records will be collected twice weekly when the osteopathic service will be  
46 provided. “*Osteopaths performing the evaluation&treatment*” will collect data in relation to  
47 the structural examination and the techniques applied, while the “*osteopaths performing the*  
48 *evaluation*” will only collect data for the structural examination.  
49  
50

51 Data export will take place at the end of the study by the statistician from the coordinating  
52 center European Institute for Evidence Based Osteopathic Medicine (EBOM).  
53  
54

### 55 **Measurements**

56 To evaluate the effect of the treatment, standard measurements will be recorded. Data will  
57 be collected at the baseline (entry time, T0), every time the osteopathic service is provided  
58  
59  
60

1 and at the end of the stay in the unit (discharge time, T1). An expected average period of 4  
2 weeks has been considered.

3 The following measurements will be included for the primary and secondary outcomes.  
4

5  
6  
7 **Primary outcome: length of stay (LOS)**

8 LOS will be used as primary outcome and measured as the mean difference in days between  
9 T1 and T0.

10 According to international guidelines, the following physiological conditions are required  
11 for discharge: maintenance of body heat at room temperature, coordinated sucking,  
12 swallowing, and breathing while feeding; sustained pattern of weight gain; stability of  
13 cardiorespiratory function (no episodes of apnea/bradycardia for 2-5 days, free of  
14 supplemental oxygen support)<sup>7</sup>.  
15  
16

17 **Secondary outcomes**

18 Secondary outcome measurements include the following parameters:  
19

- 20 1. Daily weight gain, referred as the net weight variation per day expressed in grams..
- 21 2. Episodes of vomit, the number of vomits per day
- 22 3. Episodes of regurgitation, the number of regurgitations per day
- 23 4. Episodes of stooling, the number of stools per day
- 24 5. Use of enema, the number of enemas used per day
- 25 6. Time to reach full enteral feeding, the number of days before autonomous feeding is  
26 achieved
- 27 7. NICU costs, calculated as NICU daily newborn expenses, according to local authorities,  
28 multiplied by the newborn's LOS. Costs will be estimated in euros per day
- 29 8. Side effects of treatment (osteopathy and clinical procedures)  
30  
31

32  
33 In addition to these measurements, socio-demographic and clinical data will be collected  
34 and include:

- 35 1. Newborn's data: gender, gestational age, weight at birth and at entry, height, head  
36 circumference at birth, route, type and length of delivery, diagnosis at T0 and T1,  
37 associated pathologies
- 38 2. Mother's data: age, ethnicity, BMI, nationality, number of previous pregnancies, clinical  
39 medical condition during pregnancy, concurrent pathologies
- 40 3. Father's data: age, ethnicity, BMI, nationality, concurrent pathologies  
41  
42  
43  
44

### 45 **Statistical analyses**

46 All calculations will be performed at the coordinating center EBOM.

47 Statistical analyses will take into account the intention-to-treat analysis. Missing data will  
48 be handled using last observation carried forward (LOCF) imputation technique. Arithmetic  
49 means and standard deviation will be used for the general characteristics of the study  
50 population. Univariate statistical tests will be performed to compare the experimental group  
51 and control group at the baseline. A generalized linear model, linear regression, will be  
52 considered to study the independent effect of OMT on primary endpoint and secondary  
53 endpoints, taking into account all possible confounders. The significance level will be at  
54  $\alpha=0.01$ . Differences between the groups will be presented as mean with 95% CI or in  
55 categories with OR for categorical data.  
56

57 The statistical program in use for randomization and data analyses is R<sup>17</sup>.  
58  
59  
60

### Sample size

Sample size calculation used an effect size of 0.3 calculated from previous studies, considering a mean difference of 4 days between experimental and control group and a SD of 14. The statistical power is set at 0.90 and an alfa level equal to 0.01. This produces a sample size of 333 per group. To prevent loss of power, the sample size is increased up to 345 subjects per group. The whole sample (N=690) is then divided, with a final result of N=230 preterm infants for each NICU.

### Coordinating center

The coordinating center EBOM consists of an executive division, President and Vice-President, an administration office, a group of researchers, an information technology consultant and a senior biostatistician.

The coordinating center collaborates with the A.I.O.T. - Accademia Italiana Osteopatia Tradizionale.

## ETHICS AND DISSEMINATION

Written informed consent will be obtained from parents or legal guardians at study enrollment. Participation is voluntary and data collected will be sent to the coordinating centre using an anonymous identification for each patient.

The trial is approved by the ethical committee of Macerata hospital (n°22/int./CEI/27239) and it is under review by the other regional ethics committees. Moreover the trial has been registered on clinicaltrial.gov (identifier NCT01645137).

The expected disadvantages for the intervention provided in the trial are null as well as no potential side effects due to osteopathic care are predicted as shown by the recent osteopathic literature<sup>18</sup>. However, any side effect will be recorded during the study period and appropriately discussed in the final paper.

### Publication policy

The results of the trial will be published in peer-reviewed journals and presented at relevant congresses. The trial will be implemented and reported in accordance with the CONSORT recommendations.

## DISCUSSION

The purpose of this multicentre single blinded RCT is to confirm the benefits of OMT in the care of preterm infants.

On the basis of quantitative data, the scope is to estimate the effect of OMT across different centers, proving generalizability on the effectiveness of osteopathy in NICUs. Well-designed researches are scarce in the osteopathic area, thus the present study will provide the most convincing evidence of relationship between exposure and effect.

To the best of our knowledge, this will be the first study in osteopathy applied to infants using gold standards methods that include a randomized multicentre approach, a single hub computer-based data collection and a large sample size stratified by risk factors. In addition to this, the statistics that will be used will be aimed to consider different sources of variability, to allow reliable results for the effectiveness of OMT. Finally, the expected benefits for the intervention provided in the trial are shorter period of hospitalization and

1  
2 improvements in the secondary outcomes, leading to enhanced quality of health service  
3 delivered and cost reductions.  
4

#### 5 Authors' contribution

6 CF, PG and BG conceptualized, designed and wrote the protocol. RC, D'IC, FP, PFP and  
7 TL review the protocol for important intellectual content. All authors read and approved the  
8 final manuscript.  
9

10  
11 Financial statement: This research received no specific grant from any funding agency in  
12 the public, commercial or not-for-profit sectors.  
13

14  
15 Conflict of interest: Authors declare no conflict of interest.  
16

#### 17 Acknowledgments

18 Authors would like to thank Accorsi Alessandro, D'Orazio Marianna, Galdi Stefano,  
19 Lupacchini Mariacristina, Marinelli Benedetta and Cozzolino Vincenzo for their precious  
20 contribution.  
21  
22  
23  
24  
25  
26  
27  
28  
29  
30  
31  
32  
33  
34  
35  
36  
37  
38  
39  
40  
41  
42  
43  
44  
45  
46  
47  
48  
49  
50  
51  
52  
53  
54  
55  
56  
57  
58  
59  
60

## Bibliography

1. WHO MoD, PMNCH, Save the Children. Born to soon: The Global Action Report on Preterm Birth. In: Eds CP Howson MK, JE Lawn, editor. Geneva: World Health Organization, 2012.
2. Owens PL TJ, Elixhauser A, Ryan K. Care of Children and Adolescents in U.S. Hospitals. In: 4 RHFBN, editor. *AHRQ Publication 04-0004*. Rockville, MD: Agency for Healthcare Research and Quality, 2003.
3. Clements KM, Barfield WD, Ayadi MF et al. Preterm birth-associated cost of early intervention services: an analysis by gestational age. *Pediatrics* 2007;119(4):e866-74.
4. Russell RB, Green NS, Steiner CA et al. Cost of hospitalization for preterm and low birth weight infants in the United States. *Pediatrics* 2007;120(1):e1-9.
5. Bakewell-Sachs S, Medoff-Cooper B, Escobar GJ et al. Infant functional status: the timing of physiologic maturation of premature infants. *Pediatrics* 2009;123(5):e878-86.
6. Eichenwald EC, Blackwell M, Lloyd JS et al. Inter-neonatal intensive care unit variation in discharge timing: influence of apnea and feeding management. *Pediatrics* 2001;108(4):928-33.
7. Hospital discharge of the high-risk neonate--proposed guidelines. American Academy of Pediatrics. Committee on Fetus and Newborn. *Pediatrics* 1998;102(2 Pt 1):411-7.
8. Mezzacappa MA, Rosa AC. Clinical predictors of abnormal esophageal pH monitoring in preterm infants. *Arq Gastroenterol* 2008;45(3):234-8.
9. Mihatsch WA, von Schoenaich P, Fahnenstich H et al. The significance of gastric residuals in the early enteral feeding advancement of extremely low birth weight infants. *Pediatrics* 2002;109(3):457-9.
10. Duman N, Utkutan S, Ozkan H et al. Are the stool characteristics of preterm infants affected by infant formulas? *Turk J Pediatr* 2000;42(2):138-44.
11. WOHO WOHO. Osteopathic glossary, 2012.
12. AACOM AAoCoOM. Glossary of Osteopathic Terminology, 2002.
13. Hayden C, Mullinger B. A preliminary assessment of the impact of cranial osteopathy for the relief of infantile colic. *Complement Ther Clin Pract* 2006;12(2):83-90.
14. Vandenplas Y, Denayer E, Vandenbossche T et al. Osteopathy may decrease obstructive apnea in infants: a pilot study. *Osteopath Med Prim Care* 2008;2:8.
15. Philippi H, Faldum A, Schleupen A et al. Infantile postural asymmetry and osteopathic treatment: a randomized therapeutic trial. *Dev Med Child Neurol* 2006;48(1):5-9; discussion 4.
16. Pizzolorusso G, Turi P, Barlafante G et al. Effect of osteopathic manipulative treatment on gastrointestinal function and length of stay of preterm infants: an exploratory study. *Chiropractic & Manual Therapies* 2011;19(15).
17. R Development Core Team. R: A language and environment for statistical computing. *R Foundation for Statistical Computing*. Vienna, Austria., 2010.
18. Hayes NM, Bezilla TA. Incidence of iatrogenesis associated with osteopathic manipulative treatment of pediatric patients. *J Am Osteopath Assoc* 2006;106(10):605-8.

1  
2  
3  
4  
5  
6  
7  
8  
9  
10  
11  
12  
13  
14  
15  
16  
17  
18  
19  
20  
21  
22  
23  
24  
25  
26  
27  
28  
29  
30  
31  
32  
33  
34  
35  
36  
37  
38  
39  
40  
41  
42  
43  
44  
45  
46  
47  
48  
49  
50  
51  
52  
53  
54  
55  
56  
57  
58  
59  
60

For peer review only





**EFFECTIVENESS OF OSTEOPATHIC MANIPULATIVE  
TREATMENT IN NEONATAL INTENSIVE CARE UNITS:  
PROTOCOL FOR A MULTICENTRE RANDOMIZED CLINICAL  
TRIAL**

|                                 |                                                                                                                                                                                                                                                                                                                                                                                                                                                                                                                                                                                                                                                   |
|---------------------------------|---------------------------------------------------------------------------------------------------------------------------------------------------------------------------------------------------------------------------------------------------------------------------------------------------------------------------------------------------------------------------------------------------------------------------------------------------------------------------------------------------------------------------------------------------------------------------------------------------------------------------------------------------|
| Journal:                        | <i>BMJ Open</i>                                                                                                                                                                                                                                                                                                                                                                                                                                                                                                                                                                                                                                   |
| Manuscript ID:                  | bmjopen-2012-002187.R1                                                                                                                                                                                                                                                                                                                                                                                                                                                                                                                                                                                                                            |
| Article Type:                   | Protocol                                                                                                                                                                                                                                                                                                                                                                                                                                                                                                                                                                                                                                          |
| Date Submitted by the Author:   | 28-Dec-2012                                                                                                                                                                                                                                                                                                                                                                                                                                                                                                                                                                                                                                       |
| Complete List of Authors:       | Cerritelli, Francesco; European Institute for Evidence Based Osteopathic Medicine, Research and Development<br>Pizzolorusso, Gianfranco; Accademia Italiana Osteopatia Tradizionale, Post-doc Education<br>Renzetti, Cinzia; Accademia Italiana Osteopatia Tradizionale, Education<br>D'Incecco, Carmine; Pescara's Hospital, Neonatal Intensive Care Unit<br>Fusilli, Paola; Pescara's Hospital, Neonatal Intensive Care Unit<br>Perri, Paolo; Macerata's hospital, Neonatal Intensive Care Unit<br>Tubaldi, Lucia; Macerata's hospital, Neonatal Intensive Care Unit<br>Barlafante, Gina; Accademia Italiana Osteopatia Tradizionale, Education |
| <b>Primary Subject Heading</b>: | Complementary medicine                                                                                                                                                                                                                                                                                                                                                                                                                                                                                                                                                                                                                            |
| Secondary Subject Heading:      | Paediatrics, Evidence based practice                                                                                                                                                                                                                                                                                                                                                                                                                                                                                                                                                                                                              |
| Keywords:                       | COMPLEMENTARY MEDICINE, PAEDIATRICS, PREVENTIVE MEDICINE                                                                                                                                                                                                                                                                                                                                                                                                                                                                                                                                                                                          |
|                                 |                                                                                                                                                                                                                                                                                                                                                                                                                                                                                                                                                                                                                                                   |

SCHOLARONE™  
Manuscripts



1  
2  
3  
4  
5  
6  
7  
8  
9  
10  
11  
12  
13  
14  
15  
16  
17  
18  
19  
20  
21  
22  
23  
24  
25  
26  
27  
28  
29  
30  
31  
32  
33  
34  
35  
36  
37  
38  
39  
40  
41  
42  
43  
44  
45  
46  
47  
48  
49  
50  
51  
52  
53  
54  
55  
56  
57  
58  
59  
60

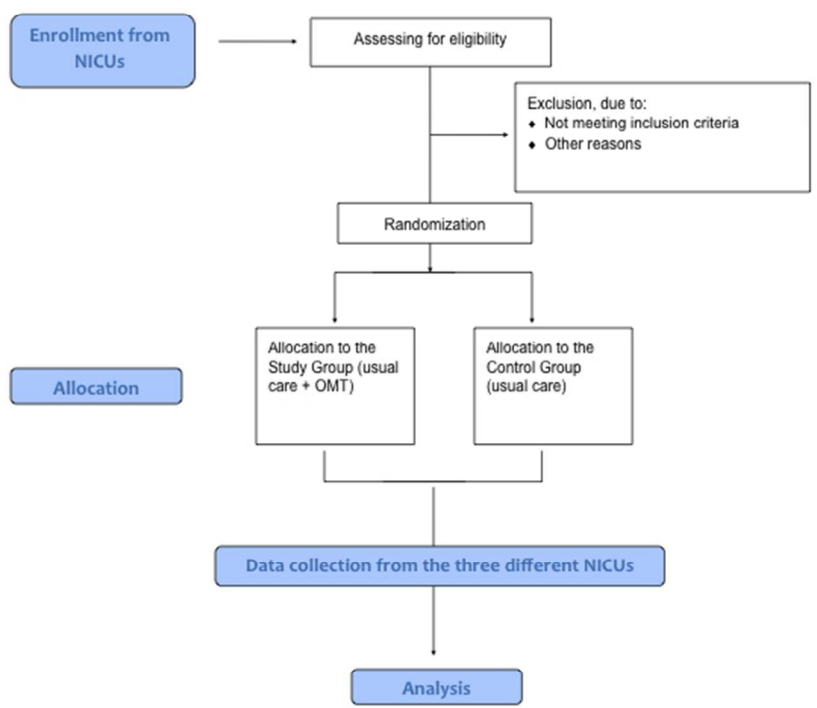

Figure 1. Flow chart describing recruitment, randomization, data collection and analysis of the study.

Flow chart describing recruitment, randomisation, data collection and analysis of the study.  
215x279mm (72 x 72 DPI)

1  
2  
3 **EFFECTIVENESS OF OSTEOPATHIC MANIPULATIVE TREATMENT IN**  
4 **NEONATAL INTENSIVE CARE UNITS: PROTOCOL FOR A MULTICENTRE**  
5 **RANDOMIZED CLINICAL TRIAL**  
6

7  
8 Cerritelli F<sup>1,2</sup>, Pizzolorusso G<sup>1,2</sup>, Renzetti C<sup>2</sup>, D’Incecco C<sup>3</sup>, Fusilli P<sup>3</sup>, Perri FP<sup>4</sup>, Tubaldi L<sup>4</sup>,  
9 Barlafante G<sup>1,2</sup>

10  
11 1 EBOM – European Institute for Evidence Based Osteopathic Medicine, Chieti, Italy

12 2 AIOT – Accademia Italiana Osteopatia Tradizionale, Pescara, Italy.

13 3 Neonatal Intensive Care Unit - “Spirito Santo” Civil Hospital, Pescara, Italy.

14 4 Neonatal Intensive Care Unit - Macerata Public Hospital  
15  
16  
17

18 Corresponding author:

19 Francesco Cerritelli

20 Via Prati, 29 - 65124 Pescara (Italy)

21 tel +39 339 4332801 fax +39 085 4172587

22 [francesco.cerritelli@ebom.it](mailto:francesco.cerritelli@ebom.it)  
23  
24  
25  
26  
27  
28  
29  
30  
31  
32  
33  
34  
35  
36  
37  
38  
39  
40  
41  
42  
43  
44  
45  
46  
47  
48  
49  
50  
51  
52  
53  
54  
55  
56  
57  
58  
59  
60

1  
2  
3 ABSTRACT  
4

5 Introduction

6 Neonatal care has been considered one of the first priorities for improving quality of life in  
7 children. In 2010 the 10% of babies were born prematurely influencing national health care  
8 policies, economic action plans and political decisions. The use of complementary medicine  
9 has been applied to the care of newborns. One previous study documented the positive  
10 effect of osteopathic manipulative treatment (OMT) in reducing newborns' length of stay  
11 (LOS). Aim of this multicentre randomized controlled trial is to examine the association  
12 between OMT and LOS across three NICUs.  
13  
14

15  
16 Methods and analysis

17 690 preterm infants will be recruited from three secondary and tertiary NICUs from north  
18 and central Italy and allocated into two groups, using permuted-block randomization.  
19 The two groups will receive standard medical care and OMT will be applied, twice a week,  
20 to the experimental group only. Outcome assessors will be blinded of study design and  
21 group allocation. The primary outcome is the mean difference in days between discharge  
22 and entry. Secondary outcomes are difference in daily weight gain, number of episodes of  
23 vomit, regurgitation, stooling, use of enema, time to full enteral feeding and NICU costs.  
24 Statistical analyses will take into account the intention-to-treat method. Missing data will be  
25 handled using last observation carried forward imputation technique.  
26  
27  
28

29 Ethics and dissemination

30 Written informed consent will be obtained from parents or legal guardians at study  
31 enrollment. The trial has been approved by the ethical committee of Macerata hospital  
32 (n°22/int./CEI/27239) and it is under review by the other regional ethics committees.  
33 Results from this trial will be disseminated through scientific medical journals and  
34 conferences.  
35  
36

37  
38 Trial registration

39 This trial has been registered at [www.clinicaltrials.org](http://www.clinicaltrials.org) (identifier NCT01645137).  
40  
41  
42  
43  
44  
45  
46  
47  
48  
49  
50  
51  
52  
53  
54  
55  
56  
57  
58  
59  
60

1  
2  
3 Article summary  
4

5 Article focus

- 6  
7 • Osteopathic treatment as a complementary and coadjuvant therapy in NICU  
8 • Effectiveness of osteopathic procedures in reducing the newborns' LOS  
9 • Osteopathy as a means to reduce NICU costs  
10

11 Key messages

- 12 • Beneficial effects of osteopathic treatment on newborns health  
13 • Cost-effectiveness of osteopathic procedures in NICU settings  
14  
15

16 Strengths and limitations of the study

- 17 • Robust study design based on multicentre nationwide randomized control trial  
18 • Single blinding  
19  
20  
21  
22  
23  
24  
25  
26  
27  
28  
29  
30  
31  
32  
33  
34  
35  
36  
37  
38  
39  
40  
41  
42  
43  
44  
45  
46  
47  
48  
49  
50  
51  
52  
53  
54  
55  
56  
57  
58  
59  
60

## INTRODUCTION

Neonatal care has been one of the major focuses of the global health system policies, in terms of services delivered, to reduce neonatal mortality and morbidity. The last report of the WHO showed that more than 1 in 10 infants are born prematurely, resulting in 15 million premature infants worldwide in 2010<sup>1</sup>. In spite of expensive neonatal intensive care units (NICUs), structural changes in the health care system have led to evidence-based guidelines that reduce preterm infants hospitalization and deaths. A large rate of US pediatric hospital stays is secondary to neonatal conditions that rank among the most expensive items in the list of services provided for children<sup>2</sup>. The highest average cost per infant is for preterm newborns with gestational age (GA) between 24-31 weeks, followed by those between 32-36 weeks, as opposed to the general population<sup>3</sup>. Costs per surviving infant generally decrease with increasing GA. In the United States, preterm/LBW infants account for half the hospitalization costs of all newborns and one quarter of overall pediatric costs<sup>4</sup>. In Italy, the cost per infant per day ranged between €200 and €500 according to infants health conditions<sup>5</sup>.

Length of stay (LOS) in NICUs is strongly associated with GA and birth weight<sup>6</sup>. Infants delivered at the earliest GA have the longest hospital stays, partly because of the higher incidence of medical complications in very low birth weight (VLBW) infants. The Italian healthcare institute reported an average LOS per different diagnostic categories ranging from 4 to 34 days<sup>5</sup>.

However, compared to term infants, premature infants are unique in their need to attain not only medical stability but also physiologic maturity, including adequate temperature control, cessation of apnea and bradycardia, and adequate feeding behavior, before they are safely discharged to home<sup>7,8</sup>.

Patterns of hospitalization of preterm infants are also associated with the presence of clinical symptoms of abnormal gastrointestinal function such as vomit, regurgitation, gastric residuals and functional constipation<sup>9-11</sup>.

Osteopathy is a form of drug-free non-invasive manual medicine, designated as complementary and alternative medicine (CAM). It relies on manual contact for diagnosis and treatment<sup>12</sup>. It respects the relationship of body, mind and spirit in health and disease; it lays emphasis on the structural and functional integrity of the body and the body's intrinsic tendency for self-healing. Osteopathic practitioners use a wide variety of therapeutic manual techniques to improve physiological function and/or support homeostasis that has been altered by somatic (body framework) dysfunction (ICD-10-CM Diagnosis Code M99.00-09), i.e. impaired or altered function of related components of the somatic system; skeletal, arthrodiagonal and myofascial structures; and related vascular, lymphatic, and neural elements<sup>13</sup>. Osteopathic practitioners use their understanding of the relationship between structure and function to optimize the body's self-regulating, self-healing capabilities. This holistic approach to patient care and healing is based on the concept that a human being is a dynamic functional unit, in which all parts are interrelated and which possesses its own self-regulatory and self-healing mechanisms. Two essential components of osteopathic health care are the structural evaluation of the patient for diagnosis and an array of manipulative techniques for treatment<sup>12</sup>.

1  
2 Aim of the structural examination is to locate somatic dysfunctions, while the array of  
3 manipulative techniques are used to relieve tissues tensions, improve blood flow and  
4 lymphatic drainage.

5 Although several studies document the effect of osteopathic manipulative treatment (OMT)  
6 in a population of pediatric patients<sup>14-16</sup>, the medical literature lacks information about any  
7 potential benefits of the use of OMT in preterm infants. The only study published  
8 demonstrated a potential positive effect of OMT in reducing the likelihood of excessive  
9 LOS and gastro-intestinal symptoms<sup>17</sup>.

10  
11  
12 Aim of this multicentre randomized controlled trial is to examine the association between  
13 OMT and LOS in a larger population.  
14  
15  
16  
17  
18  
19  
20  
21  
22  
23  
24  
25  
26  
27  
28  
29  
30  
31  
32  
33  
34  
35  
36  
37  
38  
39  
40  
41  
42  
43  
44  
45  
46  
47  
48  
49  
50  
51  
52  
53  
54  
55  
56  
57  
58  
59  
60

## METHODS AND ANALYSIS

### Aim of the study

Primary outcome is to evaluate the effectiveness of OMT in reducing LOS in a sample of premature infants.

Secondary outcome of the study is to evaluate the difference in daily weight gain, number of episodes of vomit and regurgitation, stooling, use of enema, time to full enteral feeding (nipple and/or bottle) and NICU costs.

### Study type

Interventional, multicentre nationwide single blinded randomized controlled trial.

### Population

Study population is all preterm infants entering the NICUs in the period between July 2012 and July 2013.

Preterm infants entering the trial will receive either routine medical care plus osteopathic evaluation and treatment or routine medical care plus osteopathic evaluation only (figure 1).

### Participating NICUs

Patients will be recruited from three Italian secondary and tertiary NICUs at the public hospital in Pescara, Macerata and Monza.

The three participating NICUs are located throughout Italy in urban regions with catchment areas of about 40 000 to 150 000 inhabitants. Principal investigators of the participating NICUs are neonatologists and osteopaths with at least 5 years of osteopathic treatments in NICU and specialized neonatal osteopathic education.

### Exclusion criteria

All patients entering the NICU are eligible to be enrolled in the trial, except those presenting the following clinical conditions (exclusion criteria):

- gestational age <29 weeks
- gestational age >37 weeks
- first OMT performed after 14 days from birth
- genetic disorders
- congenital disorders
- cardiovascular abnormalities
- proven or suspected necrotized enterocolitis with or without gastrointestinal perforation
- proven or suspected abdominal obstruction
- pre/post surgery patients
- pneumoperitoneum
- atelectasis
- newborn from an HIV seropositive/drug addicted mother
- respiratory disorders
- transferred to/from other hospital
- admitted for preterminal comfort care (defined as neither intubation nor cardio-respiratory resuscitation)

### Randomization process

All patients entering the study are sequentially allocated to the experimental and control arms using R software as computer random number generator<sup>18</sup>.

The type of randomization procedure is permuted-block (ratio 1:1).

The process of randomization is performed in the coordinating center.

### Research investigators

Investigators will be grouped into three groups:

1. “consultant performing the randomization”
2. “osteopaths performing the evaluation”
3. “osteopaths performing the evaluation&treatment”

#### *Consultant performing the randomization*

An information technology consultant will be responsible for randomization prior to the arrival of the osteopaths to the NICU.

#### *Osteopaths performing the evaluation*

Osteopaths in this group will perform the osteopathic evaluation in all infants entering the trial, with no knowledge about patients allocation.

The osteopathic evaluation will be performed in the absence of the “osteopaths performing the evaluation&treatment”.

#### *Osteopaths performing the evaluation&treatment*

“Osteopaths performing the evaluation&treatment” will perform an osteopathic evaluation and treatment of preterm infants from group “A”.

### Intervention provided into the trial

Patients from experimental and control groups will receive routine medical care.

After study enrollment, all patients are sampled in group A and group B.

1. Group A (OMT): patients under usual medical care plus osteopathic treatment.

Patients from this group will receive osteopathic care as follows: two treatments weekly for the entire length of stay in the unit. Patients from group A will also receive an osteopathic evaluation from the “osteopaths performing the evaluation”.

Osteopathic treatments will only be applied to patients from group A and will be performed only by the “osteopaths performing the evaluation&treatment”, not involved in the study design, data entry, statistical analysis.

Each OMT sessions involve the structural examination and specific manipulative procedures.

In newborns the structural exam is usually performed with the child lying down in the open crib or incubator. Diagnostic criteria for somatic dysfunction are focused on tissue texture abnormalities, areas of asymmetry and misalignment of bony landmarks and the quality of motion, its balance and organization.



1  
2 The second part of the OMT session is characterized by the use of a variety of therapeutic  
3 manual techniques, addressed to increase range of motion and resolve the somatic  
4 dysfunctions diagnosed.

5 Techniques to be used are in line with the benchmarks for osteopathic treatment available in  
6 the medical literature and are limited to myofascial release, balanced  
7 ligamentous/membranous tension, indirect fluidic and v-spread. The whole session will last  
8 30 minutes, 10 minutes for evaluation and 20 minutes for treatment.

9  
10  
11 2. Group B (No OMT): control group.

12 Following the same schedule as group A, patients from group B will receive usual medical  
13 care and osteopathic evaluation only. The osteopathic evaluation will last 10 minutes. To  
14 maintain blinding of NICU personnel, the following 20 minutes osteopaths will keep their  
15 position close to the incubator or bed without touching the infant.

16  
17  
18  
19 Osteopathic service will be provided twice a week, on Tuesdays and Fridays.

### 20 21 22 **Allocation concealment and blinding**

23 NICU staff are unaware of study design and outcomes.

24 NICU staff are blinded to patients allocation, since all infants will be touched by osteopaths  
25 from group A and B

### 26 27 28 **Data entering and data export**

29 Data collection will be performed using an ad hoc locally developed software called  
30 EBOM-GCCN.

31 EBOM-GCCN data set is an informatics tool that improves the efficiency and accuracy of  
32 data and has been developed to assist neonatologists, nurses and osteopaths in daily patients  
33 management.

34  
35  
36 The software consists of three sections:

37 - Section 1: Intended for use by neonatologists and nurses for recording patients' general  
38 details and all clinical information;

39 - Section 2: Intended for use by "*osteopaths performing the evaluation&treatment*";

40 - Section 3: Intended for use by "*osteopaths performing the evaluation*".

41 Records in section 1, 2 and 3 are exclusively and respectively accessible to NICU staff,  
42 "*osteopaths performing the evaluation&treatment*" and "*osteopaths performing the*  
43 *evaluation*".

44 Nursing and medical records will be collected daily by the NICU staff, from the time the  
45 infants enters the unit to the time of discharge.

46 Osteopathic records will be collected twice weekly when the osteopathic service will be  
47 provided. "*Osteopaths performing the evaluation&treatment*" will collect data in relation to  
48 the structural examination and the techniques applied, while the "*osteopaths performing the*  
49 *evaluation*" will only collect data for the structural examination.

50  
51  
52  
53  
54  
55 Data export will take place at the end of the study by the statistician from the coordinating  
56 center European Institute for Evidence Based Osteopathic Medicine (EBOM).

### 57 58 **Measurements**

To evaluate the effect of the treatment, standard measurements will be recorded. Data will be collected at the baseline (entry time, T0), every time the osteopathic service is provided and at the end of the stay in the unit (discharge time, T1). An expected average period of 4 weeks has been considered.

The following measurements will be included for the primary and secondary outcomes.

#### Primary outcome: length of stay (LOS)

LOS will be used as primary outcome and measured as the mean difference in days between T1 and T0.

According to international guidelines, the following physiological conditions are required for discharge: maintenance of body heat at room temperature, coordinated sucking, swallowing, and breathing while feeding; sustained pattern of weight gain; stability of cardiorespiratory function (no episodes of apnea/bradycardia for 2-5 days, free of supplemental oxygen support)<sup>8</sup>.

#### Secondary outcomes

Secondary outcome measurements include the following parameters:

1. daily weight gain, referred as the net weight variation per day expressed in grams
2. episodes of vomit, the number of vomits per day
3. episodes of regurgitation, the number of regurgitations per day
4. episodes of stooling, the number of stools per day
5. use of enema, the number of enemas used per day
6. time to reach full enteral feeding, the number of days before autonomous feeding is achieved
7. NICU costs, calculated as NICU daily newborn expenses, according to local authorities, multiplied by the newborn's LOS. Costs will be estimated in euros per day
8. side effects of treatment (osteopathy and clinical procedures)

In addition to these measurements, socio-demographic and clinical data will be collected and include:

1. newborn's data: gender, gestational age, weight at birth and at entry, height, head circumference at birth, route, type and length of delivery, diagnosis at T0 and T1, associated pathologies
2. mother's data: age, ethnicity, BMI, nationality, number of previous pregnancies, clinical medical condition during pregnancy, concurrent pathologies
3. father's data: age, ethnicity, BMI, nationality, concurrent pathologies

#### Statistical analyses

All calculations will be performed at the coordinating center EBOM.

Statistical analyses will take into account the intention-to-treat analysis. Missing data will be handled using last observation carried forward (LOCF) imputation technique. Arithmetic means and standard deviation will be used for the general characteristics of the study population. Univariate statistical tests will be performed to compare the experimental group and control group at the baseline. A generalized linear model, linear regression, will be considered to study the independent effect of OMT on primary endpoint and secondary endpoints, taking into account all possible confounders. The significance level will be at

1  
2  $\alpha=0.01$ . Differences between the groups will be presented as mean with 95% CI or in  
3 categories with OR for categorical data.

4 The statistical program in use for randomization and data analyses is R<sup>18</sup>.

### 6 7 **Sample size**

8 Sample size calculation used an effect size of 0.3 calculated from previous studies,  
9 considering a mean difference of 4 days between experimental and control group and a SD  
10 of 14. The statistical power is set at 0.90 and an alfa level equal to 0.01. This produces a  
11 sample size of 333 per group. To prevent loss of power, the sample size is increased up to  
12 345 subjects per group. The whole sample (N=690) is then divided, with a final result of  
13 N=230 preterm infants for each NICU.  
14

### 16 17 **Coordinating center**

18 The coordinating center EBOM consists of an executive division, President and Vice-  
19 President, an administration office, a group of researchers, an information technology  
20 consultant and a senior biostatistician.  
21

22 The coordinating center collaborates with the A.I.O.T. - Accademia Italiana Osteopatia  
23 Tradizionale.  
24

### 27 28 **ETHICS AND DISSEMINATION**

29 Written informed consent will be obtained from parents or legal guardians at study  
30 enrollment. Participation is voluntary and data collected will be sent to the coordinating  
31 centre using an anonymous identification for each patient.

32 The trial is approved by the ethical committee of Macerata hospital (n°22/int./CEI/27239)  
33 and it is under review by the other regional ethics committees. Moreover the trial has been  
34 registered on clinicaltrial.gov (identifier NCT01645137).  
35

36 The expected disadvantages for the intervention provided in the trial are null as well as no  
37 potential side effects due to osteopathic care are predicted as shown by the recent  
38 osteopathic literature<sup>19</sup>. However, any side effect will be recorded during the study period  
39 and appropriately discussed in the final paper.  
40

### 41 42 **Publication policy**

43 The results of the trial will be published in peer-reviewed journals and presented at relevant  
44 congresses. The trial will be reported in accordance with the CONSORT recommendations.  
45

### 46 47 **DISCUSSION**

48 The purpose of this multicentre single blinded RCT is to confirm the benefits of OMT in the  
49 care of preterm infants.

50 On the basis of quantitative data, the scope is to estimate the effect of OMT across different  
51 centers, proving generalizability on the effectiveness of osteopathy in NICUs. Well-  
52 designed researches are scarce in the osteopathic area, thus the present study will provide  
53 the most convincing evidence of relationship between exposure and effect.  
54

55 To the best of our knowledge, this will be the first study in osteopathy applied to infants  
56 using gold standards methods that include a randomized multicentre approach, a single hub  
57 computer-based data collection and a large sample size stratified by risk factors. In addition  
58 to this, the statistics that will be used will be aimed to consider different sources of  
59  
60

1  
2 variability, to allow reliable results for the effectiveness of OMT. Finally, the expected  
3 benefits for the intervention provided in the trial are shorter period of hospitalization and  
4 improvements in the secondary outcomes, leading to enhanced quality of health service  
5 delivered and cost reductions.  
6

#### 7 Authors' contribution

8 CF, PG and BG conceptualized, designed and wrote the protocol. RC, D'IC, FP, PFP and  
9 TL review the protocol for important intellectual content. All authors read and approved the  
10 final manuscript.  
11  
12

13  
14 Financial statement: This research received no specific grant from any funding agency in  
15 the public, commercial or not-for-profit sectors.  
16

17 Conflict of interest: Authors declare no conflict of interest.  
18

#### 19 Acknowledgments

20 Authors would like to thank Accorsi Alessandro, Cozzolino Vincenzo, D'Orazio Marianna,  
21 Gualdi Stefano, Lupacchini Mariacristina and Marinelli Benedetta for their precious  
22 contribution.  
23  
24  
25  
26  
27  
28  
29  
30  
31  
32  
33  
34  
35  
36  
37  
38  
39  
40  
41  
42  
43  
44  
45  
46  
47  
48  
49  
50  
51  
52  
53  
54  
55  
56  
57  
58  
59  
60

## Bibliography

1. World Health Organization, March of Dimes, PMNCH, Save the Children. Born to soon: The Global Action Report on Preterm Birth. In: Eds CP Howson MK, JE Lawn, editor. Geneva: World Health Organization, 2012.
2. Owens PL TJ, Elixhauser A, Ryan K. Care of Children and Adolescents in U.S. Hospitals. In: 4 RHFBN, editor. *AHRQ Publication 04-0004*. Rockville, MD: Agency for Healthcare Research and Quality, 2003.
3. Clements KM, Barfield WD, Ayadi MF et al. Preterm birth-associated cost of early intervention services: an analysis by gestational age. *Pediatrics* 2007;119(4):e866-74.
4. Russell RB, Green NS, Steiner CA et al. Cost of hospitalization for preterm and low birth weight infants in the United States. *Pediatrics* 2007;120(1):e1-9.
5. Italian Ministry of Health. Rapporto annuale sull'attività di ricovero ospedaliero - dati SDO 2010. In. Roma: Ministero della salute; 2011.
6. Bakewell-Sachs S, Medoff-Cooper B, Escobar GJ et al. Infant functional status: the timing of physiologic maturation of premature infants. *Pediatrics* 2009;123(5):e878-86.
7. Eichenwald EC, Blackwell M, Lloyd JS et al. Inter-neonatal intensive care unit variation in discharge timing: influence of apnea and feeding management. *Pediatrics* 2001;108(4):928-33.
8. Hospital discharge of the high-risk neonate--proposed guidelines. American Academy of Pediatrics. Committee on Fetus and Newborn. *Pediatrics* 1998;102(2 Pt 1):411-7.
9. Mezzacappa MA, Rosa AC. Clinical predictors of abnormal esophageal pH monitoring in preterm infants. *Arg Gastroenterol* 2008;45(3):234-8.
10. Mihatsch WA, von Schoenaich P, Fahrenstich H et al. The significance of gastric residuals in the early enteral feeding advancement of extremely low birth weight infants. *Pediatrics* 2002;109(3):457-9.
11. Duman N, Utkutan S, Ozkan H et al. Are the stool characteristics of preterm infants affected by infant formulas? *Turk J Pediatr* 2000;42(2):138-44.
12. World Osteopathic Health Organization. WOHO. Osteopathic glossary, 2011.
13. American Association of Colleges of Osteopathic Medicine. Glossary of Osteopathic Terminology, 2002.
14. Hayden C, Mullinger B. A preliminary assessment of the impact of cranial osteopathy for the relief of infantile colic. *Complement Ther Clin Pract* 2006;12(2):83-90.
15. Vandenplas Y, Denayer E, Vandenbossche T et al. Osteopathy may decrease obstructive apnea in infants: a pilot study. *Osteopath Med Prim Care* 2008;2:8.
16. Philippi H, Faldum A, Schleupen A et al. Infantile postural asymmetry and osteopathic treatment: a randomized therapeutic trial. *Dev Med Child Neurol* 2006;48(1):5-9; discussion 4.
17. Pizzolorusso G, Turi P, Barlafante G et al. Effect of osteopathic manipulative treatment on gastrointestinal function and length of stay of preterm infants: an exploratory study. *Chiropractic & Manual Therapies* 2011;19(15).
18. R Development Core Team. R: A language and environment for statistical computing. *R Foundation for Statistical Computing*. Vienna, Austria., 2010.
19. Hayes NM, Bezilla TA. Incidence of iatrogenesis associated with osteopathic manipulative treatment of pediatric patients. *J Am Osteopath Assoc* 2006;106(10):605-8.

1  
2  
3  
4  
5  
6 **STUDY PROTOCOL**  
7

8 **EFFICACY/EFFECTIVENESS OF OSTEOPATHIC MANIPULATIVE**  
9 **TREATMENT IN NEONATAL INTENSIVE CARE UNITS: PROTOCOL FOR AA**  
10 **MULTICENTRE RANDOMIZED CLINICAL TRIAL**  
11

12 Cerritelli F<sup>1,2</sup>, Pizzolorusso G<sup>1,2</sup>, Renzetti C<sup>2</sup>, D'Incecco C<sup>3</sup>, Fusilli P<sup>3</sup>, Perri FP<sup>4</sup>, Tubaldi L<sup>4</sup>,  
13 Barlafante G<sup>1,2</sup>  
14

15 1 EBOM – European Institute for Evidence Based Osteopathic Medicine, Chieti, Italy

16 2 AIOT – Accademia Italiana Osteopatia Tradizionale, Pescara, Italy.

17 3 Neonatal Intensive Care Unit - “Spirito Santo” Civil Hospital, Pescara, Italy.

18 4 Neonatal Intensive Care Unit - Macerata Public Hospital  
19

20  
21 Corresponding author:

22 Francesco Cerritelli

23 Via Prati, 29 - 65124 Pescara (Italy)

24 tel +39 339 4332801 fax +39 085 4172587

25 [francesco.cerritelli@ebom.it](mailto:francesco.cerritelli@ebom.it)  
26  
27  
28  
29  
30  
31  
32  
33  
34  
35  
36  
37  
38  
39  
40  
41  
42  
43  
44  
45  
46  
47  
48  
49  
50  
51  
52  
53  
54  
55  
56  
57  
58  
59  
60



## ABSTRACT

## Introduction

Neonatal care has been considered one of the first priorities for improving quality of life in children. In 2010 the 10% of babies were born prematurely influencing national health care policies, economic action plans and political decisions. The use of complementary medicine has been applied to the care of newborns. One previous study documented the positive effect of osteopathic manipulative treatment (OMT) in reducing newborns' length of stay (LOS).

~~Objective:~~ Aim of this [study](#) [multicentre randomized controlled trial](#) is to examine the association between OMT and LOS across three NICUs.

~~Design:~~ [multicentre randomized control trial](#)

Methods [and analysis](#)

~~Participants:~~ 690 preterm infants will be [recruited from three secondary and tertiary NICUs from north and central Italy and](#) allocated into two groups, using permuted-block randomization. ~~Outcome assessors will be blinded of study design and group allocation.~~

~~Setting:~~ [primary care. Patients will be recruited from three secondary and tertiary NICUs from north and central Italy.](#)

~~Interventions:~~ The two groups will receive standard medical care and OMT will be applied, twice a week, to the experimental group only.

~~Outcomes:~~ [Outcome assessors will be blinded of study design and group allocation.](#) The primary outcome is the mean difference in days between discharge and entry. Secondary outcomes are difference in daily weight gain, number of episodes of vomit, regurgitation, stooling, use of enema, time to full enteral feeding and NICU costs.

[Conclusions](#)

~~The scope is to estimate the effect of OMT across different centers, proving generalizability on the effectiveness of osteopathy in NICUs, leading to enhanced quality of health service delivered and cost reductions. Statistical analyses will take into account the intention-to-treat method. Missing data will be handled using last observation carried forward imputation technique.~~

## Ethics and dissemination

Written informed consent will be obtained from parents or legal guardians at study enrollment. The trial has been approved by the ethical committee of Macerata hospital (n°22/int./CEI/27239) and it is under review by the other regional ethics committees. Results from this trial will be disseminated through scientific medical journals and conferences.

Trial registration ~~number~~

This trial has been registered at [www.clinicaltrials.org](http://www.clinicaltrials.org) (identifier NCT01645137).

1  
2  
3  
4  
5  
6  
7 Article summary  
8

9 Article focus

- 10 • Osteopathic treatment as a complementary and coadjuvant therapy in NICU
  - 11 • Effectiveness of osteopathic procedures in reducing the newborns' LOS
  - 12 • Osteopathy as a means to reduce NICU costs
- 13

14 Key messages

- 15 • Beneficial effects of osteopathic treatment on newborns health
  - 16 • Cost-effectiveness of osteopathic procedures in NICU settings
- 17

18 Strengths and limitations of the study

- 19 • Robust study design based on multicentre nationwide randomized control trial
  - 20 • Single blinding
- 21  
22  
23  
24  
25  
26  
27  
28  
29  
30  
31  
32  
33  
34  
35  
36  
37  
38  
39  
40  
41  
42  
43  
44  
45  
46  
47  
48  
49  
50  
51  
52  
53  
54  
55  
56  
57  
58  
59  
60



## INTRODUCTION

Neonatal care has been one of the major focuses of the global health system policies, in terms of services delivered, to reduce neonatal mortality and morbidity. The last report of the WHO showed that more than 1 in 10 infants are born prematurely, resulting in 15 million premature infants worldwide in 2010<sup>1</sup>. In spite of expensive [neonatal intensive care units \(NICUs\)](#), structural changes in the health care system have led to evidence-based guidelines that reduce preterm infants hospitalization and deaths. –A large rate of US pediatric hospital stays– is secondary to neonatal conditions that rank among the most expensive items in the list of services provided for children<sup>2</sup>-. The [highest](#) average cost per infant is [highest](#) for preterm newborns with gestational age (GA) between 24-31 weeks, [and next highest for followed by](#) those between 32-36 weeks, as opposed to the general population<sup>3</sup>. Costs per surviving infant generally decrease with increasing GA. In the United States, preterm/LBW infants account for half the hospitalization costs of all newborns and one quarter of overall pediatric costs<sup>4</sup>. [In Italy, the cost per infant per day ranged between €200 and €500 according to infants health conditions](#)<sup>5</sup>.

Length of stay (LOS) in [neonatal intensive care units \(NICUs\)](#) is strongly associated with GA and birth weight<sup>6,8</sup>. Infants delivered at the earliest GA have the longest hospital stays, partly because of the higher incidence of medical complications in very low birth weight (VLBW) infants. [The italian healthcare institute reported an average LOS per different diagnostic categories ranging from 4 to 34 days](#)<sup>5</sup>.

However, compared to term infants, premature infants are unique in their need to attain not only medical stability but also physiologic maturity, including adequate temperature control, cessation of apnea and bradycardia, and adequate feeding behavior, before they are safely discharged to home<sup>6-7,8</sup>.

Patterns of hospitalization of preterm infants are also associated with the presence of clinical symptoms of abnormal gastrointestinal function such as vomit, regurgitation, gastric residuals and functional constipation<sup>9,10</sup>.

Osteopathy is a form of drug-free non-invasive manual medicine, designated as complementary and alternative medicine (CAM). It relies on manual contact for diagnosis and treatment<sup>12+</sup>. It respects the relationship of body, mind and spirit in health and disease; it lays emphasis on the structural and functional integrity of the body and the body's intrinsic tendency for self-healing. Osteopathic practitioners use a wide variety of therapeutic manual techniques to improve physiological function and/or support homeostasis that has been altered by somatic (body framework) dysfunction (ICD-10-CM Diagnosis Code M99.00-09), i.e. impaired or altered function of related components of the somatic system; skeletal, arthrodiadial and myofascial structures; and related vascular, lymphatic, and neural elements<sup>13,2</sup>.

Osteopathic practitioners use their understanding of the relationship between structure and function to optimize the body's self-regulating, self-healing capabilities. This holistic approach to patient care and healing is based on the concept that a human being is a dynamic functional unit, in which all parts are interrelated and which possesses its own self-regulatory and self-healing mechanisms. Two essential components of osteopathic health care are the structural evaluation of the patient for diagnosis and an array of manipulative techniques for treatment<sup>12+</sup>.

1  
2  
3  
4  
5  
6 Aim of the structural examination is to locate somatic dysfunctions, while the array of  
7 manipulative techniques are used to relieve tissues tensions, improve blood flow and  
8 lymphatic drainage.

9 Although several studies document the effect of osteopathic manipulative treatment (OMT)  
10 in a population of pediatric patients <sup>143-165</sup>, the medical literature lacks information about  
11 any potential benefits of the use of OMT in preterm infants. The only study published  
12 demonstrated a potential positive effect of OMT in reducing the likelihood of excessive  
13 LOS and gastro-intestinal symptoms <sup>176</sup>.

14  
15 ~~Aim of this multicentre RCT is to translate the above clinical observations in the light of the~~  
16 ~~evidence based approach and in a larger population.~~

17  
18 Aim of this multicentre randomized controlled trial is to examine the association between  
19 OMT and LOS in a larger population.  
20  
21  
22  
23  
24  
25  
26  
27  
28  
29  
30  
31  
32  
33  
34  
35  
36  
37  
38  
39  
40  
41  
42  
43  
44  
45  
46  
47  
48  
49  
50  
51  
52  
53  
54  
55  
56  
57  
58  
59  
60

## METHODS AND ANALYSIS

### Aim of the study

Primary [endpoint/outcome](#) is to evaluate the effectiveness of OMT in reducing LOS in a sample of premature infants.

Secondary [endpoint/outcome](#) of the study is to evaluate the difference in daily weight gain, number of episodes of vomit and regurgitation, stooling, use of enema, time to full enteral feeding (nipple and/or bottle) and NICU costs.

### Study type

Interventional, multicentre nationwide single blinded randomized controlled [led](#) trial.

### Population

Study population is all preterm infants entering the NICUs in the period between July 2012 and July 2013.

Preterm infants entering the trial will receive [either](#) routine medical care plus osteopathic evaluation and treatment [or routine medical care plus osteopathic evaluation only](#) (figure 1).

### Participating NICUs

Patients will be recruited from three Italian secondary and tertiary NICUs at the public hospital in Pescara, Macerata and Monza.

The three participating NICUs are located throughout Italy in urban regions with catchment areas of about 40 000 to 150 000 inhabitants. Principal investigators of the participating NICUs are neonatologists and osteopaths with at least 5 years [of osteopathic treatments in NICU and in neonatal care specialized neonatal osteopathic education](#).

### Inclusion/Exclusion criteria

All patients entering the NICU are eligible to be enrolled in the trial, except those presenting the following clinical conditions (exclusion criteria):

- [g](#)Gestational age <29 weeks
- [g](#)Gestational age >37 weeks
- [f](#)First OMT performed after 14 days from birth
- genetic disorders
- congenital disorders
- cardiovascular abnormalities
- proven or suspected necrotized enterocolitis with or without gastrointestinal perforation
- proven or suspected abdominal obstruction
- pre/post surgery patients
- pneumoperitoneum
- atelectasis
- [n](#)Newborn from an HIV seropositive/drug addicted mother
- respiratory disorders
- transferred to/from other hospital
- admitted for preterminal comfort care (defined as neither intubation nor cardio-respiratory resuscitation)

### Randomization process

All patients entering the study are sequentially allocated to the experimental and control arms using R software as computer random number generator<sup>187</sup>.

The type of randomization procedure is permuted-block (ratio 1:1).

The process of randomization is performed in the coordinating center.

### Research investigators

Investigators will be grouped into three groups:

1. “consultant performing the randomization”
2. “osteopaths performing the evaluation”
3. “osteopaths performing the evaluation&treatment”

#### *Consultant performing the randomization*

An information technology consultant will be responsible for randomization prior to the arrival of the osteopaths to the NICU.

#### *Osteopaths performing the evaluation*

Osteopaths in this group will perform the osteopathic evaluation in all infants entering the trial, with no knowledge about patients allocation.

The osteopathic evaluation will be performed in the absence of the “osteopaths performing the evaluation&treatment”.

#### *Osteopaths performing the evaluation&treatment*

“Osteopaths performing the evaluation&treatment” will perform an osteopathic evaluation and treatment of preterm infants from group “A”.

### Intervention provided into the trial

Patients from experimental and control groups will receive routine medical care.

After study enrollment, all patients are sampled in group A and group B.

1. Group A (OMT): patients under usual medical care plus osteopathic treatment.

Patients from this group will receive osteopathic care as follows: two treatments weekly for the entire length of stay in the unit. Patients from group A will also receive an osteopathic evaluation from the “osteopaths performing the evaluation”.

Osteopathic treatments will only be applied to patients from group A and will be performed only by the “osteopaths performing the evaluation&treatment”, not involved in the study design, data entry, statistical analysis.

Each OMT sessions involve the structural examination and specific manipulative procedures.

In newborns the structural exam is usually performed with the child lying down in the open crib or incubator. Diagnostic criteria for somatic dysfunction are focused on tissue texture abnormalities, areas of asymmetry and misalignment of bony landmarks and the quality of motion, its balance and organization.

1  
2  
3  
4  
5  
6 The second part of the OMT session is characterized by the use of a variety of therapeutic  
7 manual techniques, addressed to increase range of motion and resolve the somatic  
8 dysfunctions diagnosed.

9 Techniques to be used are in line with the benchmarks for osteopathic treatment available in  
10 the medical literature and are limited to myofascial release, balanced  
11 ligamentous/membranous tension, indirect fluidic and v-spread. [The whole session will last](#)  
12 [30 minutes, 10 minutes for evaluation and 20 minutes for treatment.](#)  
13

14 2. Group B (No OMT): control group.

15 Following the same schedule as group A, patients from group B will receive usual medical  
16 care and osteopathic evaluation only. [The osteopathic evaluation will last 10 minutes. To](#)  
17 [maintain blinding of NICU personnel, the following 20 minutes osteopaths](#)  
18 [will keep their position close to the incubator or bed without touching the infant.](#)  
19

20 Osteopathic service will be provided twice a week, on Tuesdays and Fridays.  
21  
22

### 23 **Allocation concealment and blinding**

24 NICU staff are unaware of study design and outcomes.

25 NICU staff are blinded to patients allocation, since all infants will be touched by osteopaths  
26 from group A and B  
27

### 28 **Data entering and data export**

29 Data collection will be performed using an ad hoc locally developed software called  
30 EBOM-GCCN.

31 EBOM-GCCN data set is an informatics tool that improves the efficiency and accuracy of  
32 data and has been developed to assist neonatologists, nurses and osteopaths in daily patients  
33 management.  
34

35 The software consists of three sections:

- 36 - Section 1: Intended for use by neonatologists and nurses for recording patients' general  
37 details and all clinical information;
- 38 - Section 2: Intended for use by "*osteopaths performing the evaluation&treatment*";
- 39 - Section 3: Intended for use by "*osteopaths performing the evaluation*".

40 Records in section 1, 2 and 3 are exclusively and respectively accessible to NICU staff,  
41 "*osteopaths performing the evaluation&treatment*" and "*osteopaths performing the*  
42 *evaluation*".  
43

44 Nursing and medical records will be collected daily by the NICU staff, from the time the  
45 infants enters the unit to the time of discharge.

46 Osteopathic records will be collected twice weekly when the osteopathic service will be  
47 provided. "*Osteopaths performing the evaluation&treatment*" will collect data in relation to  
48 the structural examination and the techniques applied, while the "*osteopaths performing the*  
49 *evaluation*" will only collect data for the structural examination.  
50

51 Data export will take place at the end of the study by the statistician from the coordinating  
52 center European Institute for Evidence Based Osteopathic Medicine (EBOM).  
53

### 54 **Measurements**

55  
56  
57  
58  
59  
60

To evaluate the effect of the treatment, standard measurements will be recorded. Data will be collected at the baseline (entry time, T0), every time the osteopathic service is provided and at the end of the stay in the unit (discharge time, T1). An expected average period of 4 weeks has been considered.

The following measurements will be included for the primary and secondary outcomes.

Primary outcome: length of stay (LOS)

LOS will be used as primary outcome and measured as the mean difference in days between T1 and T0.

According to international guidelines, the following physiological conditions are required for discharge: maintenance of body heat at room temperature, coordinated sucking, swallowing, and breathing while feeding; sustained pattern of weight gain; stability of cardiorespiratory function (no episodes of apnea/bradycardia for 2-5 days, free of supplemental oxygen support)<sup>87</sup>.

Secondary outcomes

Secondary outcome measurements include the following parameters:

1. ~~d~~Daily weight gain, referred as the net weight variation per day expressed in grams.
2. ~~e~~Episodes of vomit, the number of vomits per day
3. ~~e~~Episodes of regurgitation, the number of regurgitations per day
4. ~~e~~Episodes of stooling, the number of stools per day
5. ~~u~~Use of enema, the number of enemas used per day
6. ~~t~~Time to reach full enteral feeding, the number of days before autonomous feeding is achieved
7. NICU costs, calculated as NICU daily newborn expenses, according to local authorities, multiplied by the newborn's LOS. Costs will be estimated in euros per day
8. ~~s~~Side effects of treatment (osteopathy and clinical procedures)

In addition to these measurements, socio-demographic and clinical data will be collected and include:

1. ~~n~~Newborn's data: gender, gestational age, weight at birth and at entry, height, head circumference at birth, route, type and length of delivery, diagnosis at T0 and T1, associated pathologies
2. ~~m~~Mother's data: age, ethnicity, BMI, nationality, number of previous pregnancies, clinical medical condition during pregnancy, concurrent pathologies
3. ~~f~~Father's data: age, ethnicity, BMI, nationality, concurrent pathologies

### Statistical analyses

All calculations will be performed at the coordinating center EBOM.

Statistical analyses will take into account the intention-to-treat analysis. Missing data will be handled using last observation carried forward (LOCF) imputation technique. Arithmetic means and standard deviation will be used for the general characteristics of the study population. Univariate statistical tests will be performed to compare the experimental group and control group at the baseline. A generalized linear model, linear regression, will be considered to study the independent effect of OMT on primary endpoint and secondary endpoints, taking into account all possible confounders. The significance level will be at

1  
2  
3  
4  
5  
6  $\alpha=0.01$ . Differences between the groups will be presented as mean with 95% CI or in  
7 categories with OR for categorical data.

8 | The statistical program in use for randomization and data analyses is R <sup>187</sup>.

### 10 **Sample size**

11 Sample size calculation used an effect size of 0.3 calculated from previous studies,  
12 considering a mean difference of 4 days between experimental and control group and a SD  
13 of 14. The statistical power is set at 0.90 and an alfa level equal to 0.01. This produces a  
14 sample size of 333 per group. To prevent loss of power, the sample size is increased up to  
15 345 subjects per group. The whole sample (N=690) is then divided, with a final result of  
16 N=230 preterm infants for each NICU.

### 18 **Coordinating center**

19 The coordinating center EBOM consists of an executive division, President and Vice-  
20 President, an administration office, a group of researchers, an information technology  
21 consultant and a senior biostatistician.

22  
23 The coordinating center collaborates with the A.I.O.T. - Accademia Italiana Osteopatia  
24 Tradizionale.

### 27 **ETHICS AND DISSEMINATION**

28 Written informed consent will be obtained from parents or legal guardians at study  
29 enrollment. Participation is voluntary and data collected will be sent to the coordinating  
30 centre using an anonymous identification for each patient.

31 The trial is approved by the ethical committee of Macerata hospital (n°22/int./CEI/27239)  
32 and it is under review by the other regional ethics committees. Moreover the trial has been  
33 registered on clinicaltrial.gov (identifier NCT01645137).

34 The expected disadvantages for the intervention provided in the trial are null as well as no  
35 potential side effects due to osteopathic care are predicted as shown by the recent  
36 osteopathic literature <sup>198</sup>. However, any side effect will be recorded during the study period  
37 | and appropriately discussed in the final paper.

### 39 **Publication policy**

40 The results of the trial will be published in peer-reviewed journals and presented at relevant  
41 | congresses. The trial will be ~~implemented and~~ reported in accordance with the CONSORT  
42 recommendations.

### 45 **DISCUSSION**

46 The purpose of this multicentre single blinded RCT is to confirm the benefits of OMT in the  
47 care of preterm infants.

48 On the basis of quantitative data, the scope is to estimate the effect of OMT across different  
49 centers, proving generalizability on the effectiveness of osteopathy in NICUs. Well-  
50 designed researches are scarce in the osteopathic area, thus the present study will provide  
51 the most convincing evidence of relationship between exposure and effect.

52 To the best of our knowledge, this will be the first study in osteopathy applied to infants  
53 using gold standards methods that include a randomized multicentre approach, a single hub  
54 computer-based data collection and a large sample size stratified by risk factors. In addition  
55  
56  
57  
58  
59  
60



1  
2  
3  
4  
5  
6 to this, the statistics that will be used will be aimed to consider different sources of  
7 variability, to allow reliable results for the effectiveness of OMT. Finally, the expected  
8 benefits for the intervention provided in the trial are shorter period of hospitalization and  
9 improvements in the secondary outcomes, leading to enhanced quality of health service  
10 delivered and cost reductions.

#### 11 Authors' contribution

12 CF, PG and BG conceptualized, designed and wrote the protocol. RC, D'IC, FP, PFP and  
13 TL review the protocol for important intellectual content. All authors read and approved the  
14 final manuscript.

15  
16  
17 Financial statement: This research received no specific grant from any funding agency in  
18 the public, commercial or not-for-profit sectors.

19  
20 Conflict of interest: Authors declare no conflict of interest.

#### 21 Acknowledgments

22  
23 Authors would like to thank Accorsi Alessandro, [Cozzolino Vincenzo](#), D'Orazio Marianna,  
24 Galdi Stefano, Lupacchini Mariacristina ~~and~~ ~~Marinelli Benedetta~~ ~~and~~ ~~Cozzolino~~  
25 ~~Vincenzo~~ for their precious contribution.



## Bibliography

1. [World Health Organization, \*MoD March of Dimes\*](#), PMNCH, Save the Children. Born too soon: The Global Action Report on Preterm Birth. In: Eds CP Howson MK, JE Lawn, editor. Geneva: World Health Organization, 2012.
2. Owens PL TJ, Elixhauser A, Ryan K. Care of Children and Adolescents in U.S. Hospitals. In: 4 RHFBN, editor. *AHRQ Publication 04-0004*. Rockville, MD: Agency for Healthcare Research and Quality, 2003.
3. Clements KM, Barfield WD, Ayadi MF et al. Preterm birth-associated cost of early intervention services: an analysis by gestational age. *Pediatrics* 2007;119(4):e866-74.
4. Russell RB, Green NS, Steiner CA et al. Cost of hospitalization for preterm and low birth weight infants in the United States. *Pediatrics* 2007;120(1):e1-9.
5. [Italian Ministry of Health. \*Rapporto annuale sull'attività di ricovero ospedaliero - dati SDO 2010\*. In. Roma: Ministero della salute; 2011.](#)
6. Bakewell-Sachs S, Medoff-Cooper B, Escobar GJ et al. Infant functional status: the timing of physiologic maturation of premature infants. *Pediatrics* 2009;123(5):e878-86.
7. Eichenwald EC, Blackwell M, Lloyd JS et al. Inter-neonatal intensive care unit variation in discharge timing: influence of apnea and feeding management. *Pediatrics* 2001;108(4):928-33.
8. Hospital discharge of the high-risk neonate--proposed guidelines. American Academy of Pediatrics. Committee on Fetus and Newborn. *Pediatrics* 1998;102(2 Pt 1):411-7.
9. Mezzacappa MA, Rosa AC. Clinical predictors of abnormal esophageal pH monitoring in preterm infants. *Arq Gastroenterol* 2008;45(3):234-8.
10. Mihatsch WA, von Schoenaich P, Fahrenstich H et al. The significance of gastric residuals in the early enteral feeding advancement of extremely low birth weight infants. *Pediatrics* 2002;109(3):457-9.
11. Duman N, Utkutan S, Ozkan H et al. Are the stool characteristics of preterm infants affected by infant formulas? *Turk J Pediatr* 2000;42(2):138-44.
12. [World Osteopathic Health Organization](#). WOHO. Osteopathic glossary, 2011.
13. [AACOM AAoCoMAmerican Association of Colleges of Osteopathic Medicine](#). Glossary of Osteopathic Terminology, 2002.
14. Hayden C, Mullinger B. A preliminary assessment of the impact of cranial osteopathy for the relief of infantile colic. *Complement Ther Clin Pract* 2006;12(2):83-90.
15. Vandenplas Y, Denayer E, Vandenbossche T et al. Osteopathy may decrease obstructive apnea in infants: a pilot study. *Osteopath Med Prim Care* 2008;2:8.
16. Philippi H, Faldum A, Schleupen A et al. Infantile postural asymmetry and osteopathic treatment: a randomized therapeutic trial. *Dev Med Child Neurol* 2006;48(1):5-9; discussion 4.
17. Pizzolorusso G, Turi P, Barlafante G et al. Effect of osteopathic manipulative treatment on gastrointestinal function and length of stay of preterm infants: an exploratory study. *Chiropractic & Manual Therapies* 2011;19(15).
18. R Development Core Team. R: A language and environment for statistical computing. *R Foundation for Statistical Computing*. Vienna, Austria., 2010.
19. Hayes NM, Bezilla TA. Incidence of iatrogenesis associated with osteopathic manipulative treatment of pediatric patients. *J Am Osteopath Assoc* 2006;106(10):605-8.

Formatted: Indent: Left: 0", Hanging: 0.68", Outline numbered + Level: 1 + Numbering Style: 1, 2, 3, ... + Start at: 4 + Alignment: Left + Aligned at: 0.18" + Tab after: 0.18" + Indent at: 0.18"

1  
2  
3  
4  
5  
6  
7  
8  
9  
10  
11  
12  
13  
14  
15  
16  
17  
18  
19  
20  
21  
22  
23  
24  
25  
26  
27  
28  
29  
30  
31  
32  
33  
34  
35  
36  
37  
38  
39  
40  
41  
42  
43  
44  
45  
46  
47  
48  
49  
50  
51  
52  
53  
54  
55  
56  
57  
58  
59  
60

For peer review only

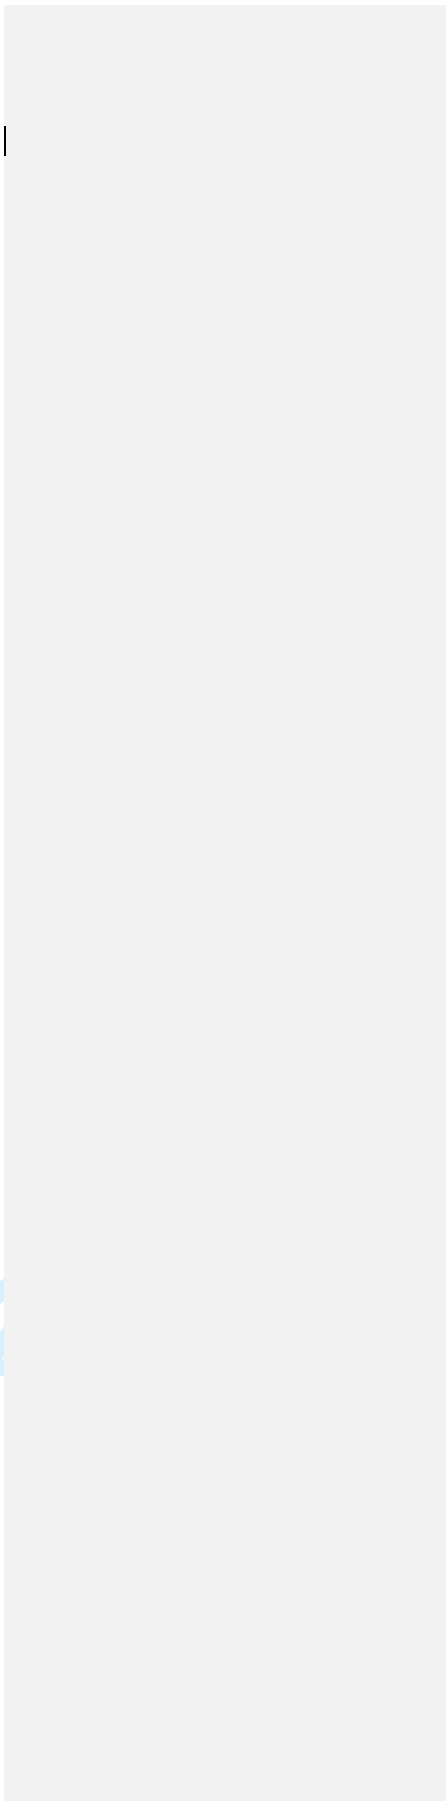



**EFFECTIVENESS OF OSTEOPATHIC MANIPULATIVE  
TREATMENT IN NEONATAL INTENSIVE CARE UNITS:  
PROTOCOL FOR A MULTICENTRE RANDOMIZED CLINICAL  
TRIAL**

|                                 |                                                                                                                                                                                                                                                                                                                                                                                                                                                                                                                                                                                                                                                   |
|---------------------------------|---------------------------------------------------------------------------------------------------------------------------------------------------------------------------------------------------------------------------------------------------------------------------------------------------------------------------------------------------------------------------------------------------------------------------------------------------------------------------------------------------------------------------------------------------------------------------------------------------------------------------------------------------|
| Journal:                        | <i>BMJ Open</i>                                                                                                                                                                                                                                                                                                                                                                                                                                                                                                                                                                                                                                   |
| Manuscript ID:                  | bmjopen-2012-002187.R2                                                                                                                                                                                                                                                                                                                                                                                                                                                                                                                                                                                                                            |
| Article Type:                   | Protocol                                                                                                                                                                                                                                                                                                                                                                                                                                                                                                                                                                                                                                          |
| Date Submitted by the Author:   | 22-Jan-2013                                                                                                                                                                                                                                                                                                                                                                                                                                                                                                                                                                                                                                       |
| Complete List of Authors:       | Cerritelli, Francesco; European Institute for Evidence Based Osteopathic Medicine, Research and Development<br>Pizzolorusso, Gianfranco; Accademia Italiana Osteopatia Tradizionale, Post-doc Education<br>Renzetti, Cinzia; Accademia Italiana Osteopatia Tradizionale, Education<br>D'Incecco, Carmine; Pescara's Hospital, Neonatal Intensive Care Unit<br>Fusilli, Paola; Pescara's Hospital, Neonatal Intensive Care Unit<br>Perri, Paolo; Macerata's hospital, Neonatal Intensive Care Unit<br>Tubaldi, Lucia; Macerata's hospital, Neonatal Intensive Care Unit<br>Barlafante, Gina; Accademia Italiana Osteopatia Tradizionale, Education |
| <b>Primary Subject Heading</b>: | Complementary medicine                                                                                                                                                                                                                                                                                                                                                                                                                                                                                                                                                                                                                            |
| Secondary Subject Heading:      | Paediatrics, Evidence based practice                                                                                                                                                                                                                                                                                                                                                                                                                                                                                                                                                                                                              |
| Keywords:                       | COMPLEMENTARY MEDICINE, PAEDIATRICS, PREVENTIVE MEDICINE                                                                                                                                                                                                                                                                                                                                                                                                                                                                                                                                                                                          |
|                                 |                                                                                                                                                                                                                                                                                                                                                                                                                                                                                                                                                                                                                                                   |

SCHOLARONE™  
Manuscripts

1  
2  
3 **EFFECTIVENESS OF OSTEOPATHIC MANIPULATIVE TREATMENT IN**  
4 **NEONATAL INTENSIVE CARE UNITS: PROTOCOL FOR A MULTICENTRE**  
5 **RANDOMIZED CLINICAL TRIAL**  
6

7  
8 Cerritelli F<sup>1,2</sup>, Pizzolorusso G<sup>1,2</sup>, Renzetti C<sup>2</sup>, D’Incecco C<sup>3</sup>, Fusilli P<sup>3</sup>, Perri FP<sup>4</sup>, Tubaldi L<sup>4</sup>,  
9 Barlafante G<sup>1,2</sup>

10  
11 1 EBOM – European Institute for Evidence Based Osteopathic Medicine, Chieti, Italy

12 2 AIOT – Accademia Italiana Osteopatia Tradizionale, Pescara, Italy.

13 3 Neonatal Intensive Care Unit - “Spirito Santo” Civil Hospital, Pescara, Italy.

14 4 Neonatal Intensive Care Unit - Macerata Public Hospital  
15  
16  
17

18 Corresponding author:

19 Francesco Cerritelli

20 Via Prati, 29 - 65124 Pescara (Italy)

21 tel +39 339 4332801 fax +39 085 4172587

22 [francesco.cerritelli@ebom.it](mailto:francesco.cerritelli@ebom.it)  
23  
24  
25  
26  
27  
28  
29  
30  
31  
32  
33  
34  
35  
36  
37  
38  
39  
40  
41  
42  
43  
44  
45  
46  
47  
48  
49  
50  
51  
52  
53  
54  
55  
56  
57  
58  
59  
60

## ABSTRACT

### Introduction

Neonatal care has been considered one of the first priorities for improving quality of life in children. In 2010 the 10% of babies were born prematurely influencing national health care policies, economic action plans and political decisions. The use of complementary medicine has been applied to the care of newborns. One previous study documented the positive effect of osteopathic manipulative treatment (OMT) in reducing newborns' length of stay (LOS). Aim of this multicentre randomized controlled trial is to examine the association between OMT and LOS across three NICUs.

### Methods and analysis

690 preterm infants will be recruited from three secondary and tertiary NICUs from north and central Italy and allocated into two groups, using permuted-block randomization. The two groups will receive standard medical care and OMT will be applied, twice a week, to the experimental group only. Outcome assessors will be blinded of study design and group allocation. The primary outcome is the mean difference in days between discharge and entry. Secondary outcomes are difference in daily weight gain, number of episodes of vomit, regurgitation, stooling, use of enema, time to full enteral feeding and NICU costs. Statistical analyses will take into account the intention-to-treat method. Missing data will be handled using last observation carried forward imputation technique.

### Ethics and dissemination

Written informed consent will be obtained from parents or legal guardians at study enrollment. The trial has been approved by the ethical committee of Macerata hospital (n°22/int./CEI/27239) and it is under review by the other regional ethics committees. Results from this trial will be disseminated through scientific medical journals and conferences.

### Trial registration

This trial has been registered at [www.clinicaltrials.org](http://www.clinicaltrials.org) (identifier NCT01645137).

1  
2  
3  
4 Article summary  
5

6 Article focus  
7

- 8 • Osteopathic treatment as a complementary and coadjuvant therapy in NICU  
9 • Effectiveness of osteopathic procedures in reducing the newborns' LOS  
10 • Osteopathy as a means to reduce NICU costs  
11

12 Key messages  
13

- 14 • Beneficial effects of osteopathic treatment on newborns health  
15 • Cost-effectiveness of osteopathic procedures in NICU settings  
16

17 Strengths and limitations of the study  
18

- 19 • Robust study design based on multicentre nationwide randomized control trial  
20 • Single blinding  
21  
22  
23  
24  
25  
26  
27  
28  
29  
30  
31  
32  
33  
34  
35  
36  
37  
38  
39  
40  
41  
42  
43  
44  
45  
46  
47  
48  
49  
50  
51  
52  
53  
54  
55  
56  
57  
58  
59  
60

## INTRODUCTION

Neonatal care has been one of the major focuses of the global health system policies, in terms of services delivered, to reduce neonatal mortality and morbidity. The last report of the WHO showed that more than 1 in 10 infants are born prematurely, resulting in 15 million premature infants worldwide in 2010<sup>1</sup>. In spite of expensive neonatal intensive care units (NICUs), structural changes in the health care system have led to evidence-based guidelines that reduce preterm infants hospitalization and deaths. A large rate of US pediatric hospital stays is secondary to neonatal conditions that rank among the most expensive items in the list of services provided for children<sup>2</sup>. The highest average cost per infant is for preterm newborns with gestational age (GA) between 24-31 weeks, followed by those between 32-36 weeks, as opposed to the general population<sup>3</sup>. Costs per surviving infant generally decrease with increasing GA. In the United States, preterm/LBW infants account for half the hospitalization costs of all newborns and one quarter of overall pediatric costs<sup>4</sup>. In Italy, the cost per infant per day ranged between €200 and €500 according to infants health conditions<sup>5</sup>.

Length of stay (LOS) in NICUs is strongly associated with GA and birth weight<sup>6</sup>. Infants delivered at the earliest GA have the longest hospital stays, partly because of the higher incidence of medical complications in very low birth weight (VLBW) infants. The Italian healthcare institute reported an average LOS per different diagnostic categories ranging from 4 to 34 days<sup>5</sup>.

However, compared to term infants, premature infants are unique in their need to attain not only medical stability but also physiologic maturity, including adequate temperature control, cessation of apnea and bradycardia, and adequate feeding behavior, before they are safely discharged to home<sup>7,8</sup>.

Patterns of hospitalization of preterm infants are also associated with the presence of clinical symptoms of abnormal gastrointestinal function such as vomit, regurgitation, gastric residuals and functional constipation<sup>9-11</sup>.

Osteopathy is a form of drug-free non-invasive manual medicine, designated as complementary and alternative medicine (CAM). It relies on manual contact for diagnosis and treatment<sup>12</sup>. It respects the relationship of body, mind and spirit in health and disease; it lays emphasis on the structural and functional integrity of the body and the body's intrinsic tendency for self-healing. Osteopathic practitioners use a wide variety of therapeutic manual techniques to improve physiological function and/or support homeostasis that has been altered by somatic (body framework) dysfunction (ICD-10-CM Diagnosis Code M99.00-09), i.e. impaired or altered function of related components of the somatic system; skeletal, arthrodial and myofascial structures; and related vascular, lymphatic, and neural elements<sup>13</sup>. Osteopathic practitioners use their understanding of the relationship between structure and function to optimize the body's self-regulating, self-healing capabilities. This holistic approach to patient care and healing is based on the concept that a human being is a dynamic functional unit, in which all parts are interrelated and which possesses its own self-regulatory and self-healing mechanisms. Two essential components of osteopathic health care are the structural evaluation of the patient for diagnosis and an array of manipulative techniques for treatment<sup>12</sup>.

1  
2 Aim of the structural examination is to locate somatic dysfunctions, while the array of  
3 manipulative techniques are used to relieve tissues tensions, improve blood flow and  
4 lymphatic drainage.

5 Although several studies document the effect of osteopathic manipulative treatment (OMT)  
6 in a population of pediatric patients<sup>14-16</sup>, the medical literature lacks information about any  
7 potential benefits of the use of OMT in preterm infants. The only study published  
8 demonstrated a potential positive effect of OMT in reducing the likelihood of excessive  
9 LOS and gastro-intestinal symptoms<sup>17</sup>.

10  
11  
12 Aim of this multicentre randomized controlled trial is to examine the association between  
13 OMT and LOS in a larger population.  
14  
15  
16  
17  
18  
19  
20  
21  
22  
23  
24  
25  
26  
27  
28  
29  
30  
31  
32  
33  
34  
35  
36  
37  
38  
39  
40  
41  
42  
43  
44  
45  
46  
47  
48  
49  
50  
51  
52  
53  
54  
55  
56  
57  
58  
59  
60



## METHODS AND ANALYSIS

### Aim of the study

Primary outcome is to evaluate the effectiveness of OMT in reducing LOS in a sample of premature infants.

Secondary outcome of the study is to evaluate the difference in daily weight gain, number of episodes of vomit and regurgitation, stooling, use of enema, time to full enteral feeding (nipple and/or bottle) and NICU costs.

### Study type

Interventional, multicentre nationwide single blinded randomized controlled trial. Preterm infants entering the trial will receive either routine medical care plus osteopathic evaluation and treatment or routine medical care plus osteopathic evaluation only (figure 1).

### Participating NICUs

Patients will be recruited from three Italian secondary and tertiary NICUs at the public hospital in Pescara, Macerata and Monza.

The three participating NICUs are located throughout Italy in urban regions with catchment areas of about 40 000 to 150 000 inhabitants. Principal investigators of the participating NICUs are neonatologists and osteopaths with at least 5 years of osteopathic treatments in NICU and specialized neonatal osteopathic education.

### Population

All patients entering the NICUs in the period between July 2012 and July 2013 are eligible to be enrolled in the trial. Inclusion criteria comprehend: male and female premature infants born in the same hospital of the referred NICU, premies free of medical complications and parents or legal guardian written informed consent.

Subjects presenting the following clinical conditions are excluded:

- gestational age <29 weeks
- gestational age >37 weeks
- first OMT performed after 14 days from birth
- genetic disorders
- congenital disorders
- cardiovascular abnormalities
- proven or suspected necrotized enterocolitis with or without gastrointestinal perforation
- proven or suspected abdominal obstruction
- pre/post surgery patients
- pneumoperitoneum
- atelectasis
- newborn from an HIV seropositive/drug addicted mother
- respiratory disorders
- transferred to/from other hospital
- admitted for preterminal comfort care (defined as neither intubation nor cardio-respiratory resuscitation)

### Randomization process

All patients entering the study are sequentially allocated to the experimental and control arms using R (R core team, Vienna, Austria), an open source statistical software, as computer random number generator<sup>18</sup>.

The type of randomization procedure is permuted-block (ratio 1:1).

The process of randomization is performed in the coordinating center.

### Research investigators

Investigators will be grouped into three groups:

1. “consultant performing the randomization”
2. “osteopaths performing the evaluation”
3. “osteopaths performing the evaluation&treatment”

#### *Consultant performing the randomization*

An information technology consultant will be responsible for randomization prior to the arrival of the osteopaths to the NICU.

#### *Osteopaths performing the evaluation*

Osteopaths in this group will perform the osteopathic evaluation in all infants entering the trial, with no knowledge about patients allocation.

The osteopathic evaluation will be performed in the absence of the “osteopaths performing the evaluation&treatment”.

#### *Osteopaths performing the evaluation&treatment*

“Osteopaths performing the evaluation&treatment” will perform an osteopathic evaluation and treatment of preterm infants from group “A”.

### Intervention provided into the trial

Patients from experimental and control groups will receive routine medical care.

After study enrollment, all patients are sampled in group A and group B.

1. Group A (OMT): patients under usual medical care plus osteopathic treatment.

Patients from this group will receive osteopathic care as follows: two treatments weekly for the entire length of stay in the unit. Patients from group A will also receive an osteopathic evaluation from the “osteopaths performing the evaluation”.

Osteopathic treatments will only be applied to patients from group A and will be performed only by the “osteopaths performing the evaluation&treatment”, not involved in the study design, data entry, statistical analysis.

Each OMT sessions involve the structural examination and specific manipulative procedures.

In newborns the structural exam is usually performed with the child lying down in the open crib or incubator. Diagnostic criteria for somatic dysfunction are focused on tissue texture abnormalities, areas of asymmetry and misalignment of bony landmarks and the quality of motion, its balance and organization.

1  
2 The second part of the OMT session is characterized by the use of a variety of therapeutic  
3 manual techniques, addressed to increase range of motion and resolve the somatic  
4 dysfunctions diagnosed.

5 Techniques to be used are in line with the benchmarks for osteopathic treatment available in  
6 the medical literature and are limited to myofascial release, balanced  
7 ligamentous/membranous tension, indirect fluidic and v-spread. The whole session will last  
8 30 minutes, 10 minutes for evaluation and 20 minutes for treatment.  
9

## 10 11 2. Group B (No OMT): control group.

12 Following the same schedule as group A, patients from group B will receive usual medical  
13 care and osteopathic evaluation only. The osteopathic evaluation will last 10 minutes. To  
14 maintain blinding of NICU personnel, the following 20 minutes osteopaths will keep their  
15 position close to the incubator or bed without touching the infant.  
16  
17

18  
19 Osteopathic service will be provided twice a week, on Tuesdays and Fridays.  
20

21 In case of critical premie's health conditions (i.e. acute infections, per-acute emergency  
22 care) or supplemental neonatal medical screening during the osteopathic service, the  
23 aforementioned intervention can be temporally stopped for a given trial participant. The  
24 infant will not be either evaluated or treated. This is in line with hospital safety procedures  
25 and primary care priority intervention.  
26  
27

## 28 **Allocation concealment and blinding**

29 NICU staff are unaware of study design and outcomes.

30 NICU staff are blinded to patients allocation, since all infants will be touched by osteopaths  
31 from group A and B  
32  
33

## 34 **Data entering and data export**

35 Data collection will be performed using an ad hoc locally developed software called  
36 EBOM-GCCN.  
37

38 EBOM-GCCN data set is an informatics tool that improves the efficiency and accuracy of  
39 data and has been developed to assist neonatologists, nurses and osteopaths in daily patients  
40 management.  
41  
42

43 The software consists of three sections:

44 - Section 1: Intended for use by neonatologists and nurses for recording patients' general  
45 details and all clinical information;

46 - Section 2: Intended for use by "*osteopaths performing the evaluation&treatment*";

47 - Section 3: Intended for use by "*osteopaths performing the evaluation*".  
48

49 Records in section 1, 2 and 3 are exclusively and respectively accessible to NICU staff,  
50 "*osteopaths performing the evaluation&treatment*" and "*osteopaths performing the*  
51 *evaluation*".

52 Nursing and medical records will be collected daily by the NICU staff, from the time the  
53 infants enters the unit to the time of discharge.  
54

55 Osteopathic records will be collected twice weekly when the osteopathic service will be  
56 provided. "*Osteopaths performing the evaluation&treatment*" will collect data in relation to  
57 the structural examination and the techniques applied, while the "*osteopaths performing the*  
58 *evaluation*" will only collect data for the structural examination.  
59  
60

1  
2  
3 Data export will take place at the end of the study by the statistician from the coordinating  
4 center European Institute for Evidence Based Osteopathic Medicine (EBOM).  
5  
6

### 7 **Measurements**

8 To evaluate the effect of the treatment, standard measurements will be recorded. Data will  
9 be collected at the baseline (entry time, T0), every time the osteopathic service is provided  
10 and at the end of the stay in the unit (discharge time, T1). An expected average period of 4  
11 weeks has been considered.  
12

13 The following measurements will be included for the primary and secondary outcomes.  
14

15 Primary outcome: length of stay (LOS)

16 LOS will be used as primary outcome and measured as the mean difference in days between  
17 T1 and T0.  
18

19 According to international guidelines, the following physiological conditions are required  
20 for discharge: maintenance of body heat at room temperature, coordinated sucking,  
21 swallowing, and breathing while feeding; sustained pattern of weight gain; stability of  
22 cardiorespiratory function (no episodes of apnea/bradycardia for 2-5 days, free of  
23 supplemental oxygen support)<sup>8</sup>.  
24  
25

26 Secondary outcomes

27 Secondary outcome measurements include the following parameters:

- 28 1. daily weight gain, referred as the net weight variation per day expressed in grams
- 29 2. episodes of vomit, the number of vomits per day
- 30 3. episodes of regurgitation, the number of regurgitations per day
- 31 4. episodes of stooling, the number of stools per day
- 32 5. use of enema, the number of enemas used per day
- 33 6. time to reach full enteral feeding, the number of days before autonomous feeding is  
34 achieved
- 35 7. NICU costs, calculated as NICU daily newborn expenses, according to local authorities,  
36 multiplied by the newborn's LOS. Costs will be estimated in euros per day
- 37 8. side effects of treatment (osteopathy and clinical procedures)  
38  
39  
40

41 In addition to these measurements, socio-demographic and clinical data will be collected  
42 and include:

- 43 1. newborn's data: gender, gestational age, weight at birth and at entry, height, head  
44 circumference at birth, route, type and length of delivery, diagnosis at T0 and T1,  
45 associated pathologies
- 46 2. mother's data: age, ethnicity, BMI, nationality, number of previous pregnancies, clinical  
47 medical condition during pregnancy, concurrent pathologies
- 48 3. father's data: age, ethnicity, BMI, nationality, concurrent pathologies  
49  
50  
51  
52

### 53 **Statistical analyses**

54 All calculations will be performed at the coordinating center EBOM.

55 Statistical analyses will take into account the intention-to-treat analysis. Missing data will  
56 be handled using last observation carried forward (LOCF) imputation technique. Arithmetic  
57 means and standard deviation will be used for the general characteristics of the study  
58  
59  
60

1  
2 population. Univariate statistical tests will be performed to compare the experimental group  
3 and control group at the baseline. A generalized linear model, linear regression, will be  
4 considered to study the independent effect of OMT on primary endpoint and secondary  
5 endpoints, taking into account all possible confounders. The significance level will be at  
6  $\alpha=0.01$ . Differences between the groups will be presented as mean with 95% CI or in  
7 categories with OR for categorical data.

8  
9 The statistical program in use for randomization and data analyses is R<sup>18</sup>.

### 11 **Sample size**

12 Sample size calculation used an effect size of 0.3 calculated from previous studies,  
13 considering a mean difference of 4 days between experimental and control group and a SD  
14 of 14. The statistical power is set at 0.90 and an alpha level equal to 0.01. This produces a  
15 sample size of 333 per group. To prevent loss of power, the sample size is increased up to  
16 345 subjects per group. The whole sample (N=690) is then divided, with a final result of  
17 N=230 preterm infants for each NICU. A longer period of study enrollment has been  
18 considered a strategy to achieve the estimated sample size.

### 22 **Coordinating center**

23 The coordinating center EBOM consists of an executive division, President and Vice-  
24 President, an administration office, a group of researchers, an information technology  
25 consultant and a senior biostatistician.

26  
27  
28 The coordinating center collaborates with the A.I.O.T. - Accademia Italiana Osteopatia  
29 Tradizionale.

### 33 **ETHICS AND DISSEMINATION**

34 During the routine initial post-delivery consultation, the neonatologist approaches parents or  
35 legal guardians explaining the patient information sheet. Written informed consent will be  
36 then obtained from the above-mentioned guardians at study enrollment. Participation is  
37 voluntary and data collected will be sent to the coordinating centre using an anonymous  
38 identification for each patient.

39  
40 The trial is approved by the ethical committee of Macerata hospital (n°22/int./CEI/27239)  
41 and it is under review by the other regional ethics committees. Moreover the trial has been  
42 registered on clinicaltrial.gov (identifier NCT01645137).

43  
44 The expected disadvantages for the intervention provided in the trial are null as well as no  
45 potential side effects due to osteopathic care are predicted as shown by the recent  
46 osteopathic literature<sup>19</sup>. However, any side effect will be recorded during the study period  
47 and appropriately discussed in the final paper.

### 50 **Publication policy**

51 The results of the trial will be published in peer-reviewed journals and presented at relevant  
52 congresses. The trial will be reported in accordance with the CONSORT recommendations.

### 55 **DISCUSSION**

56 The purpose of this multicentre single blinded RCT is to confirm the benefits of OMT in the  
57 care of preterm infants. In this trial, osteopathic care is not based on a predetermined  
58 protocol but on needs-based approach. Thus subjects can potentially be exposed to different  
59  
60

1 techniques, leading to inter-subjects and intra-subjects OMT variability. Nevertheless the  
2 objective is to provide evidence of the impact of osteopathic approach rather than the  
3 association with a given manual protocol.

4  
5 On the basis of quantitative data, the scope is to estimate the effect of OMT across different  
6 centers, proving generalizability on the effectiveness of osteopathy in NICUs. Well-  
7 designed researches are scarce in the osteopathic area, thus the present study will provide  
8 the most convincing evidence of relationship between exposure and effect.

9  
10 To the best of our knowledge, this will be the first study in osteopathy applied to infants  
11 using gold standards methods that include a randomized multicentre approach, a single hub  
12 computer-based data collection and a large sample size stratified by risk factors. In addition  
13 to this, the statistics that will be used will be aimed to consider different sources of  
14 variability, to allow reliable results for the effectiveness of OMT. Finally, the expected  
15 benefits for the intervention provided in the trial are shorter period of hospitalization and  
16 improvements in the secondary outcomes, leading to enhanced quality of health service  
17 delivered and cost reductions.  
18  
19

#### 20 21 Authors' contribution

22 CF, PG and BG conceptualized, designed and wrote the protocol. RC, D'IC, FP, PFP and  
23 TL review the protocol for important intellectual content. All authors read and approved the  
24 final manuscript.  
25

26  
27 Financial statement: This research received no specific grant from any funding agency in  
28 the public, commercial or not-for-profit sectors.  
29

30  
31 Conflict of interest: Authors declare no conflict of interest.  
32

#### 33 Acknowledgments

34 Authors would like to thank Accorsi Alessandro, Cozzolino Vincenzo, D'Orazio Marianna,  
35 Gualdi Stefano, Lupacchini Mariacristina and Marinelli Benedetta for their precious  
36 contribution.  
37  
38  
39  
40  
41  
42  
43  
44  
45  
46  
47  
48  
49  
50  
51  
52  
53  
54  
55  
56  
57  
58  
59  
60



## Bibliography

1. World Health Organization, March of Dimes, PMNCH, Save the Children. Born to soon: The Global Action Report on Preterm Birth. In: Eds CP Howson MK, JE Lawn, editor. Geneva: World Health Organization, 2012.
2. Owens PL TJ, Elixhauser A, Ryan K. Care of Children and Adolescents in U.S. Hospitals. In: 4 RHFBN, editor. *AHRQ Publication 04-0004*. Rockville, MD: Agency for Healthcare Research and Quality, 2003.
3. Clements KM, Barfield WD, Ayadi MF et al. Preterm birth-associated cost of early intervention services: an analysis by gestational age. *Pediatrics* 2007;119(4):e866-74.
4. Russell RB, Green NS, Steiner CA et al. Cost of hospitalization for preterm and low birth weight infants in the United States. *Pediatrics* 2007;120(1):e1-9.
5. Italian Ministry of Health. Rapporto annuale sull'attività di ricovero ospedaliero - dati SDO 2010. In. Roma: Ministero della salute; 2011.
6. Bakewell-Sachs S, Medoff-Cooper B, Escobar GJ et al. Infant functional status: the timing of physiologic maturation of premature infants. *Pediatrics* 2009;123(5):e878-86.
7. Eichenwald EC, Blackwell M, Lloyd JS et al. Inter-neonatal intensive care unit variation in discharge timing: influence of apnea and feeding management. *Pediatrics* 2001;108(4):928-33.
8. Hospital discharge of the high-risk neonate--proposed guidelines. American Academy of Pediatrics. Committee on Fetus and Newborn. *Pediatrics* 1998;102(2 Pt 1):411-7.
9. Mezzacappa MA, Rosa AC. Clinical predictors of abnormal esophageal pH monitoring in preterm infants. *Arg Gastroenterol* 2008;45(3):234-8.
10. Mihatsch WA, von Schoenaich P, Fahrenstich H et al. The significance of gastric residuals in the early enteral feeding advancement of extremely low birth weight infants. *Pediatrics* 2002;109(3):457-9.
11. Duman N, Utkutan S, Ozkan H et al. Are the stool characteristics of preterm infants affected by infant formulas? *Turk J Pediatr* 2000;42(2):138-44.
12. World Osteopathic Health Organization. WOHO. Osteopathic glossary, 2011.
13. American Association of Colleges of Osteopathic Medicine. Glossary of Osteopathic Terminology, 2002.
14. Hayden C, Mullinger B. A preliminary assessment of the impact of cranial osteopathy for the relief of infantile colic. *Complement Ther Clin Pract* 2006;12(2):83-90.
15. Vandenplas Y, Denayer E, Vandenbossche T et al. Osteopathy may decrease obstructive apnea in infants: a pilot study. *Osteopath Med Prim Care* 2008;2:8.
16. Philippi H, Faldum A, Schleupen A et al. Infantile postural asymmetry and osteopathic treatment: a randomized therapeutic trial. *Dev Med Child Neurol* 2006;48(1):5-9; discussion 4.
17. Pizzolorusso G, Turi P, Barlafante G et al. Effect of osteopathic manipulative treatment on gastrointestinal function and length of stay of preterm infants: an exploratory study. *Chiropractic & Manual Therapies* 2011;19(15).
18. R Development Core Team. R: A language and environment for statistical computing. *R Foundation for Statistical Computing*. Vienna, Austria., 2010.
19. Hayes NM, Bezilla TA. Incidence of iatrogenesis associated with osteopathic manipulative treatment of pediatric patients. *J Am Osteopath Assoc* 2006;106(10):605-8.

1  
2  
3  
4  
5  
6  
7 **EFFECTIVENESS OF OSTEOPATHIC MANIPULATIVE TREATMENT IN**  
8 **NEONATAL INTENSIVE CARE UNITS: PROTOCOL FOR A MULTICENTRE**  
9 **RANDOMIZED CLINICAL TRIAL**  
10

11 Cerritelli F<sup>1,2</sup>, Pizzolorusso G<sup>1,2</sup>, Renzetti C<sup>2</sup>, D'Incecco C<sup>3</sup>, Fusilli P<sup>3</sup>, Perri FP<sup>4</sup>, Tubaldi L<sup>4</sup>,  
12 Barlafante G<sup>1,2</sup>  
13

14 1 EBOM – European Institute for Evidence Based Osteopathic Medicine, Chieti, Italy

15 2 AIOT – Accademia Italiana Osteopatia Tradizionale, Pescara, Italy.

16 3 Neonatal Intensive Care Unit - “Spirito Santo” Civil Hospital, Pescara, Italy.

17 4 Neonatal Intensive Care Unit - Macerata Public Hospital  
18  
19

20 Corresponding author:

21 Francesco Cerritelli

22 Via Prati, 29 - 65124 Pescara (Italy)

23 tel +39 339 4332801 fax +39 085 4172587

24 [francesco.cerritelli@ebom.it](mailto:francesco.cerritelli@ebom.it)  
25  
26  
27  
28  
29  
30  
31  
32  
33  
34  
35  
36  
37  
38  
39  
40  
41  
42  
43  
44  
45  
46  
47  
48  
49  
50  
51  
52  
53  
54  
55  
56  
57  
58  
59  
60



## ABSTRACT

### Introduction

Neonatal care has been considered one of the first priorities for improving quality of life in children. In 2010 the 10% of babies were born prematurely influencing national health care policies, economic action plans and political decisions. The use of complementary medicine has been applied to the care of newborns. One previous study documented the positive effect of osteopathic manipulative treatment (OMT) in reducing newborns' length of stay (LOS). Aim of this multicentre randomized controlled trial is to examine the association between OMT and LOS across three NICUs.

### Methods and analysis

690 preterm infants will be recruited from three secondary and tertiary NICUs from north and central Italy and allocated into two groups, using permuted-block randomization. The two groups will receive standard medical care and OMT will be applied, twice a week, to the experimental group only. Outcome assessors will be blinded of study design and group allocation. The primary outcome is the mean difference in days between discharge and entry. Secondary outcomes are difference in daily weight gain, number of episodes of vomit, regurgitation, stooling, use of enema, time to full enteral feeding and NICU costs. Statistical analyses will take into account the intention-to-treat method. Missing data will be handled using last observation carried forward imputation technique.

### Ethics and dissemination

Written informed consent will be obtained from parents or legal guardians at study enrollment. The trial has been approved by the ethical committee of Macerata hospital (n°22/int./CEI/27239) and it is under review by the other regional ethics committees. Results from this trial will be disseminated through scientific medical journals and conferences.

### Trial registration

This trial has been registered at [www.clinicaltrials.org](http://www.clinicaltrials.org) (identifier NCT01645137).

1  
2  
3  
4  
5  
6  
7  
8  
9  
10  
11  
12  
13  
14  
15  
16  
17  
18  
19  
20  
21  
22  
23  
24  
25  
26  
27  
28  
29  
30  
31  
32  
33  
34  
35  
36  
37  
38  
39  
40  
41  
42  
43  
44  
45  
46  
47  
48  
49  
50  
51  
52  
53  
54  
55  
56  
57  
58  
59  
60

Article summary

Article focus

- Osteopathic treatment as a complementary and coadjuvant therapy in NICU
- Effectiveness of osteopathic procedures in reducing the newborns' LOS
- Osteopathy as a means to reduce NICU costs

Key messages

- Beneficial effects of osteopathic treatment on newborns health
- Cost-effectiveness of osteopathic procedures in NICU settings

Strengths and limitations of the study

- Robust study design based on multicentre nationwide randomized control trial
- Single blinding

## INTRODUCTION

Neonatal care has been one of the major focuses of the global health system policies, in terms of services delivered, to reduce neonatal mortality and morbidity. The last report of the WHO showed that more than 1 in 10 infants are born prematurely, resulting in 15 million premature infants worldwide in 2010<sup>1</sup>. In spite of expensive neonatal intensive care units (NICUs), structural changes in the health care system have led to evidence-based guidelines that reduce preterm infants hospitalization and deaths. A large rate of US pediatric hospital stays is secondary to neonatal conditions that rank among the most expensive items in the list of services provided for children<sup>2</sup>. The highest average cost per infant is for preterm newborns with gestational age (GA) between 24-31 weeks, followed by those between 32-36 weeks, as opposed to the general population<sup>3</sup>. Costs per surviving infant generally decrease with increasing GA. In the United States, preterm/LBW infants account for half the hospitalization costs of all newborns and one quarter of overall pediatric costs<sup>4</sup>. In Italy, the cost per infant per day ranged between €200 and €500 according to infants health conditions<sup>5</sup>.

Length of stay (LOS) in NICUs is strongly associated with GA and birth weight<sup>6</sup>. Infants delivered at the earliest GA have the longest hospital stays, partly because of the higher incidence of medical complications in very low birth weight (VLBW) infants. The Italian healthcare institute reported an average LOS per different diagnostic categories ranging from 4 to 34 days<sup>5</sup>.

However, compared to term infants, premature infants are unique in their need to attain not only medical stability but also physiologic maturity, including adequate temperature control, cessation of apnea and bradycardia, and adequate feeding behavior, before they are safely discharged to home<sup>7,8</sup>.

Patterns of hospitalization of preterm infants are also associated with the presence of clinical symptoms of abnormal gastrointestinal function such as vomit, regurgitation, gastric residuals and functional constipation<sup>9-11</sup>.

Osteopathy is a form of drug-free non-invasive manual medicine, designated as complementary and alternative medicine (CAM). It relies on manual contact for diagnosis and treatment<sup>12</sup>. It respects the relationship of body, mind and spirit in health and disease; it lays emphasis on the structural and functional integrity of the body and the body's intrinsic tendency for self-healing. Osteopathic practitioners use a wide variety of therapeutic manual techniques to improve physiological function and/or support homeostasis that has been altered by somatic (body framework) dysfunction (ICD-10-CM Diagnosis Code M99.00-09), i.e. impaired or altered function of related components of the somatic system; skeletal, arthrodiagonal and myofascial structures; and related vascular, lymphatic, and neural elements<sup>13</sup>. Osteopathic practitioners use their understanding of the relationship between structure and function to optimize the body's self-regulating, self-healing capabilities. This holistic approach to patient care and healing is based on the concept that a human being is a dynamic functional unit, in which all parts are interrelated and which possesses its own self-regulatory and self-healing mechanisms. Two essential components of osteopathic health care are the structural evaluation of the patient for diagnosis and an array of manipulative techniques for treatment<sup>12</sup>.

1  
2  
3  
4  
5  
6 Aim of the structural examination is to locate somatic dysfunctions, while the array of  
7 manipulative techniques are used to relieve tissues tensions, improve blood flow and  
8 lymphatic drainage.

9 Although several studies document the effect of osteopathic manipulative treatment (OMT)  
10 in a population of pediatric patients<sup>14-16</sup>, the medical literature lacks information about any  
11 potential benefits of the use of OMT in preterm infants. The only study published  
12 demonstrated a potential positive effect of OMT in reducing the likelihood of excessive  
13 LOS and gastro-intestinal symptoms<sup>17</sup>.

14  
15 Aim of this multicentre randomized controlled trial is to examine the association between  
16 OMT and LOS in a larger population.  
17  
18  
19  
20  
21  
22  
23  
24  
25  
26  
27  
28  
29  
30  
31  
32  
33  
34  
35  
36  
37  
38  
39  
40  
41  
42  
43  
44  
45  
46  
47  
48  
49  
50  
51  
52  
53  
54  
55  
56  
57  
58  
59  
60

## METHODS AND ANALYSIS

### Aim of the study

Primary outcome is to evaluate the effectiveness of OMT in reducing LOS in a sample of premature infants.

Secondary outcome of the study is to evaluate the difference in daily weight gain, number of episodes of vomit and regurgitation, stooling, use of enema, time to full enteral feeding (nipple and/or bottle) and NICU costs.

### Study type

Interventional, multicentre nationwide single blinded randomized controlled trial. Preterm infants entering the trial will receive either routine medical care plus osteopathic evaluation and treatment or routine medical care plus osteopathic evaluation only (figure 1).

### Population

~~Study population is all preterm infants entering the NICUs in the period between July 2012 and July 2013.~~

~~Preterm infants entering the trial will receive either routine medical care plus osteopathic evaluation and treatment or routine medical care plus osteopathic evaluation only (figure 1).~~

Formatted: Font: 13 pt

### Participating NICUs

Patients will be recruited from three Italian secondary and tertiary NICUs at the public hospital in Pescara, Macerata and Monza.

The three participating NICUs are located throughout Italy in urban regions with catchment areas of about 40 000 to 150 000 inhabitants. Principal investigators of the participating NICUs are neonatologists and osteopaths with at least 5 years of osteopathic treatments in NICU and specialized neonatal osteopathic education.

### Exclusion criteria

Population  
All patients entering the NICUs in the period between July 2012 and July 2013 are eligible to be enrolled in the trial. Inclusion criteria comprehend: male and female premature infants born in the same hospital of the referred NICU, preemies free of medical complications and parents or legal guardian written informed consent.

Subjects, except those presenting the following clinical conditions are excluded: (exclusion criteria):

- gestational age <29 weeks
- gestational age >37 weeks
- first OMT performed after 14 days from birth
- genetic disorders
- congenital disorders
- cardiovascular abnormalities
- proven or suspected necrotized enterocolitis with or without gastrointestinal perforation
- proven or suspected abdominal obstruction
- pre/post surgery patients
- pneumoperitoneum

- atelectasis
- newborn from an HIV seropositive/drug addicted mother
- respiratory disorders
- transferred to/from other hospital
- admitted for preterminal comfort care (defined as neither intubation nor cardio-respiratory resuscitation)

### Randomization process

All patients entering the study are sequentially allocated to the experimental and control arms using [R \(R core team, Vienna, Austria\), an open source statistical software, R software](#) as computer random number generator<sup>18</sup>.

The type of randomization procedure is permuted-block (ratio 1:1).

The process of randomization is performed in the coordinating center.

### Research investigators

Investigators will be grouped into three groups:

1. “consultant performing the randomization”
2. “osteopaths performing the evaluation”
3. “osteopaths performing the evaluation&treatment”

#### *Consultant performing the randomization*

An information technology consultant will be responsible for randomization prior to the arrival of the osteopaths to the NICU.

#### *Osteopaths performing the evaluation*

Osteopaths in this group will perform the osteopathic evaluation in all infants entering the trial, with no knowledge about patients allocation.

The osteopathic evaluation will be performed in the absence of the “osteopaths performing the evaluation&treatment”.

#### *Osteopaths performing the evaluation&treatment*

“Osteopaths performing the evaluation&treatment” will perform an osteopathic evaluation and treatment of preterm infants from group “A”.

### Intervention provided into the trial

Patients from experimental and control groups will receive routine medical care.

After study enrollment, all patients are sampled in group A and group B.

1. Group A (OMT): patients under usual medical care plus osteopathic treatment.

Patients from this group will receive osteopathic care as follows: two treatments weekly for the entire length of stay in the unit. Patients from group A will also receive an osteopathic evaluation from the “osteopaths performing the evaluation”.

Osteopathic treatments will only be applied to patients from group A and will be performed only by the “osteopaths performing the evaluation&treatment”, not involved in the study design, data entry, statistical analysis.

Each OMT sessions involve the structural examination and specific manipulative procedures.

In newborns the structural exam is usually performed with the child lying down in the open crib or incubator. Diagnostic criteria for somatic disfunction are focused on tissue texture abnormalities, areas of asymmetry and misalignment of bony landmarks and the quality of motion, its balance and organization.

The second part of the OMT session is characterized by the use of a variety of therapeutic manual techniques, addressed to increase range of motion and resolve the somatic dysfunctions diagnosed.

Techniques to be used are in line with the benchmarks for osteopathic treatment available in the medical literature and are limited to myofascial release, balanced ligamentous/membranous tension, indirect fluidic and v-spread. The whole session will last 30 minutes, 10 minutes for evaluation and 20 minutes for treatment.

## 2. Group B (No OMT): control group.

Following the same schedule as group A, patients from group B will receive usual medical care and osteopathic evaluation only. The osteopathic evaluation will last 10 minutes. To maintain blinding of NICU personnel, the following 20 minutes osteopaths will keep their position close to the incubator or bed without touching the infant.

Osteopathic service will be provided twice a week, on Tuesdays and Fridays.

In case of critical preemie's health conditions (i.e. acute infections, per-acute emergency care) or supplemental neonatal medical screening during the osteopathic service, the aforementioned intervention can be temporally stopped for a given trial participant. The infant will not be either evaluated or treated. This is in line with hospital safety procedures and primary care priority intervention.

### **Allocation concealment and blinding**

NICU staff are unaware of study design and outcomes.

NICU staff are blinded to patients allocation, since all infants will be touched by osteopaths from group A and B

### **Data entering and data export**

Data collection will be performed using an ad hoc locally developed software called EBOM-GCCN.

EBOM-GCCN data set is an informatics tool that improves the efficiency and accuracy of data and has been developed to assist neonatologists, nurses and osteopaths in daily patients management.

The software consists of three sections:

- Section 1: Intended for use by neonatologists and nurses for recording patients' general details and all clinical information;
- Section 2: Intended for use by "osteopaths performing the evaluation&treatment";
- Section 3: Intended for use by "osteopaths performing the evaluation".

Records in section 1, 2 and 3 are exclusively and respectively accessible to NICU staff, “osteopaths performing the evaluation&treatment” and “osteopaths performing the evaluation”.

Nursing and medical records will be collected daily by the NICU staff, from the time the infants enters the unit to the time of discharge.

Osteopathic records will be collected twice weekly when the osteopathic service will be provided. “Osteopaths performing the evaluation&treatment” will collect data in relation to the structural examination and the techniques applied, while the “osteopaths performing the evaluation” will only collect data for the structural examination.

Data export will take place at the end of the study by the statistician from the coordinating center European Institute for Evidence Based Osteopathic Medicine (EBOM).

### Measurements

To evaluate the effect of the treatment, standard measurements will be recorded. Data will be collected at the baseline (entry time, T0), every time the osteopathic service is provided and at the end of the stay in the unit (discharge time, T1). An expected average period of 4 weeks has been considered.

The following measurements will be included for the primary and secondary outcomes.

Primary outcome: length of stay (LOS)

LOS will be used as primary outcome and measured as the mean difference in days between T1 and T0.

According to international guidelines, the following physiological conditions are required for discharge: maintenance of body heat at room temperature, coordinated sucking, swallowing, and breathing while feeding; sustained pattern of weight gain; stability of cardiorespiratory function (no episodes of apnea/bradycardia for 2-5 days, free of supplemental oxygen support)<sup>8</sup>.

Secondary outcomes

Secondary outcome measurements include the following parameters:

1. daily weight gain, referred as the net weight variation per day expressed in grams
2. episodes of vomit, the number of vomits per day
3. episodes of regurgitation, the number of regurgitations per day
4. episodes of stooling, the number of stools per day
5. use of enema, the number of enemas used per day
6. time to reach full enteral feeding, the number of days before autonomous feeding is achieved
7. NICU costs, calculated as NICU daily newborn expenses, according to local authorities, multiplied by the newborn’s LOS. Costs will be estimated in euros per day
8. side effects of treatment (osteopathy and clinical procedures)

In addition to these measurements, socio-demographic and clinical data will be collected and include:

1. newborn’s data: gender, gestational age, weight at birth and at entry, height, head circumference at birth, route, type and length of delivery, diagnosis at T0 and T1, associated pathologies



2. mother's data: age, ethnicity, BMI, nationality, number of previous pregnancies, clinical medical condition during pregnancy, concurrent pathologies
3. father's data: age, ethnicity, BMI, nationality, concurrent pathologies

### Statistical analyses

All calculations will be performed at the coordinating center EBOM.

Statistical analyses will take into account the intention-to-treat analysis. Missing data will be handled using last observation carried forward (LOCF) imputation technique. Arithmetic means and standard deviation will be used for the general characteristics of the study population. Univariate statistical tests will be performed to compare the experimental group and control group at the baseline. A generalized linear model, linear regression, will be considered to study the independent effect of OMT on primary endpoint and secondary endpoints, taking into account all possible confounders. The significance level will be at  $\alpha=0.01$ . Differences between the groups will be presented as mean with 95% CI or in categories with OR for categorical data.

The statistical program in use for randomization and data analyses is R<sup>18</sup>.

### Sample size

Sample size calculation used an effect size of 0.3 calculated from previous studies, considering a mean difference of 4 days between experimental and control group and a SD of 14. The statistical power is set at 0.90 and an alpha level equal to 0.01. This produces a sample size of 333 per group. To prevent loss of power, the sample size is increased up to 345 subjects per group. The whole sample (N=690) is then divided, with a final result of N=230 preterm infants for each NICU. A longer period of study enrollment has been considered a strategy to achieve the estimated sample size.

### Coordinating center

The coordinating center EBOM consists of an executive division, President and Vice-President, an administration office, a group of researchers, an information technology consultant and a senior biostatistician.

The coordinating center collaborates with the A.I.O.T. - Accademia Italiana Osteopatia Tradizionale.

### ETHICS AND DISSEMINATION

During the routine initial post-delivery consultation, the neonatologist approaches parents or legal guardians explaining the patient information sheet. Written informed consent will be then obtained from ~~parents or legal guardians~~the above-mentioned guardians at study enrollment. --Participation is voluntary and data collected will be sent to the coordinating centre using an anonymous identification for each patient.

The trial is approved by the ethical committee of Macerata hospital (n°22/int./CEI/27239) and it is under review by the other regional ethics committees. Moreover the trial has been registered on clinicaltrial.gov (identifier NCT01645137).

The expected disadvantages for the intervention provided in the trial are null as well as no potential side effects due to osteopathic care are predicted as shown by the recent

osteopathic literature<sup>19</sup>. However, any side effect will be recorded during the study period and appropriately discussed in the final paper.

#### Publication policy

The results of the trial will be published in peer-reviewed journals and presented at relevant congresses. The trial will be reported in accordance with the CONSORT recommendations.

## DISCUSSION

The purpose of this multicentre single blinded RCT is to confirm the benefits of OMT in the care of preterm infants. In this trial, osteopathic care is not based on a predetermined protocol but on needs-based approach. Thus subjects can potentially be exposed to different techniques, leading to inter-subjects and intra-subjects OMT variability. Nevertheless the objective is to provide evidence of the impact of osteopathic approach rather than the association with a given manual protocol.

On the basis of quantitative data, the scope is to estimate the effect of OMT across different centers, proving generalizability on the effectiveness of osteopathy in NICUs. Well-designed researches are scarce in the osteopathic area, thus the present study will provide the most convincing evidence of relationship between exposure and effect.

To the best of our knowledge, this will be the first study in osteopathy applied to infants using gold standards methods that include a randomized multicentre approach, a single hub computer-based data collection and a large sample size stratified by risk factors. In addition to this, the statistics that will be used will be aimed to consider different sources of variability, to allow reliable results for the effectiveness of OMT. Finally, the expected benefits for the intervention provided in the trial are shorter period of hospitalization and improvements in the secondary outcomes, leading to enhanced quality of health service delivered and cost reductions.

#### Authors' contribution

CF, PG and BG conceptualized, designed and wrote the protocol. RC, D'IC, FP, PFP and TL review the protocol for important intellectual content. All authors read and approved the final manuscript.

Financial statement: This research received no specific grant from any funding agency in the public, commercial or not-for-profit sectors.

Conflict of interest: Authors declare no conflict of interest.

#### Acknowledgments

Authors would like to thank Accorsi Alessandro, Cozzolino Vincenzo, D'Orazio Marianna, Gualdi Stefano, Lupacchini Mariacristina and Marinelli Benedetta for their precious contribution.

## Bibliography

1. World Health Organization, March of Dimes, PMNCH, Save the Children. Born to soon: The Global Action Report on Preterm Birth. In: Eds CP Howson MK, JE Lawn, editor. Geneva: World Health Organization, 2012.
2. Owens PL TJ, Elixhauser A, Ryan K. Care of Children and Adolescents in U.S. Hospitals. In: 4 RHFBN, editor. *AHRQ Publication 04-0004*. Rockville, MD: Agency for Healthcare Research and Quality, 2003.
3. Clements KM, Barfield WD, Ayadi MF et al. Preterm birth-associated cost of early intervention services: an analysis by gestational age. *Pediatrics* 2007;119(4):e866-74.
4. Russell RB, Green NS, Steiner CA et al. Cost of hospitalization for preterm and low birth weight infants in the United States. *Pediatrics* 2007;120(1):e1-9.
5. Italian Ministry of Health. Rapporto annuale sull'attività di ricovero ospedaliero - dati SDO 2010. In. Roma: Ministero della salute; 2011.
6. Bakewell-Sachs S, Medoff-Cooper B, Escobar GJ et al. Infant functional status: the timing of physiologic maturation of premature infants. *Pediatrics* 2009;123(5):e878-86.
7. Eichenwald EC, Blackwell M, Lloyd JS et al. Inter-neonatal intensive care unit variation in discharge timing: influence of apnea and feeding management. *Pediatrics* 2001;108(4):928-33.
8. Hospital discharge of the high-risk neonate--proposed guidelines. American Academy of Pediatrics. Committee on Fetus and Newborn. *Pediatrics* 1998;102(2 Pt 1):411-7.
9. Mezzacappa MA, Rosa AC. Clinical predictors of abnormal esophageal pH monitoring in preterm infants. *Arq Gastroenterol* 2008;45(3):234-8.
10. Mihatsch WA, von Schoenaich P, Fahrenstich H et al. The significance of gastric residuals in the early enteral feeding advancement of extremely low birth weight infants. *Pediatrics* 2002;109(3):457-9.
11. Duman N, Utkutan S, Ozkan H et al. Are the stool characteristics of preterm infants affected by infant formulas? *Turk J Pediatr* 2000;42(2):138-44.
12. World Osteopathic Health Organization. WOHO. Osteopathic glossary, 2011.
13. American Association of Colleges of Osteopathic Medicine. Glossary of Osteopathic Terminology, 2002.
14. Hayden C, Mullinger B. A preliminary assessment of the impact of cranial osteopathy for the relief of infantile colic. *Complement Ther Clin Pract* 2006;12(2):83-90.
15. Vandenplas Y, Denayer E, Vandenbossche T et al. Osteopathy may decrease obstructive apnea in infants: a pilot study. *Osteopath Med Prim Care* 2008;2:8.
16. Philippi H, Faldum A, Schleupen A et al. Infantile postural asymmetry and osteopathic treatment: a randomized therapeutic trial. *Dev Med Child Neurol* 2006;48(1):5-9; discussion 4.
17. Pizzolorusso G, Turi P, Barlafante G et al. Effect of osteopathic manipulative treatment on gastrointestinal function and length of stay of preterm infants: an exploratory study. *Chiropractic & Manual Therapies* 2011;19(15).
18. R Development Core Team. R: A language and environment for statistical computing. *R Foundation for Statistical Computing*. Vienna, Austria., 2010.
19. Hayes NM, Bezilla TA. Incidence of iatrogenesis associated with osteopathic manipulative treatment of pediatric patients. *J Am Osteopath Assoc* 2006;106(10):605-8.

1  
2  
3  
4  
5  
6  
7  
8  
9  
10  
11  
12  
13  
14  
15  
16  
17  
18  
19  
20  
21  
22  
23  
24  
25  
26  
27  
28  
29  
30  
31  
32  
33  
34  
35  
36  
37  
38  
39  
40  
41  
42  
43  
44  
45  
46  
47  
48  
49  
50  
51  
52  
53  
54  
55  
56  
57  
58  
59  
60



Figure 1. Flow chart describing recruitment, randomization, data collection and analysis of the study.

Flow chart describing recruitment, randomisation, data collection and analysis of the study.  
215x279mm (72 x 72 DPI)



**EFFECTIVENESS OF OSTEOPATHIC MANIPULATIVE  
TREATMENT IN NEONATAL INTENSIVE CARE UNITS:  
PROTOCOL FOR A MULTICENTRE RANDOMIZED CLINICAL  
TRIAL**

|                                 |                                                                                                                                                                                                                                                                                                                                                                                                                                                                                                                                                                                                                                                   |
|---------------------------------|---------------------------------------------------------------------------------------------------------------------------------------------------------------------------------------------------------------------------------------------------------------------------------------------------------------------------------------------------------------------------------------------------------------------------------------------------------------------------------------------------------------------------------------------------------------------------------------------------------------------------------------------------|
| Journal:                        | <i>BMJ Open</i>                                                                                                                                                                                                                                                                                                                                                                                                                                                                                                                                                                                                                                   |
| Manuscript ID:                  | bmjopen-2012-002187.R3                                                                                                                                                                                                                                                                                                                                                                                                                                                                                                                                                                                                                            |
| Article Type:                   | Protocol                                                                                                                                                                                                                                                                                                                                                                                                                                                                                                                                                                                                                                          |
| Date Submitted by the Author:   | 24-Jan-2013                                                                                                                                                                                                                                                                                                                                                                                                                                                                                                                                                                                                                                       |
| Complete List of Authors:       | Cerritelli, Francesco; European Institute for Evidence Based Osteopathic Medicine, Research and Development<br>Pizzolorusso, Gianfranco; Accademia Italiana Osteopatia Tradizionale, Post-doc Education<br>Renzetti, Cinzia; Accademia Italiana Osteopatia Tradizionale, Education<br>D'Incecco, Carmine; Pescara's Hospital, Neonatal Intensive Care Unit<br>Fusilli, Paola; Pescara's Hospital, Neonatal Intensive Care Unit<br>Perri, Paolo; Macerata's hospital, Neonatal Intensive Care Unit<br>Tubaldi, Lucia; Macerata's hospital, Neonatal Intensive Care Unit<br>Barlafante, Gina; Accademia Italiana Osteopatia Tradizionale, Education |
| <b>Primary Subject Heading</b>: | Complementary medicine                                                                                                                                                                                                                                                                                                                                                                                                                                                                                                                                                                                                                            |
| Secondary Subject Heading:      | Paediatrics, Evidence based practice                                                                                                                                                                                                                                                                                                                                                                                                                                                                                                                                                                                                              |
| Keywords:                       | COMPLEMENTARY MEDICINE, PAEDIATRICS, PREVENTIVE MEDICINE                                                                                                                                                                                                                                                                                                                                                                                                                                                                                                                                                                                          |
|                                 |                                                                                                                                                                                                                                                                                                                                                                                                                                                                                                                                                                                                                                                   |

SCHOLARONE™  
Manuscripts

1  
2  
3 **EFFECTIVENESS OF OSTEOPATHIC MANIPULATIVE TREATMENT IN**  
4 **NEONATAL INTENSIVE CARE UNITS: PROTOCOL FOR A MULTICENTRE**  
5 **RANDOMIZED CLINICAL TRIAL**  
6

7  
8 Cerritelli F<sup>1,2</sup>, Pizzolorusso G<sup>1,2</sup>, Renzetti C<sup>2</sup>, D’Incecco C<sup>3</sup>, Fusilli P<sup>3</sup>, Perri FP<sup>4</sup>, Tubaldi L<sup>4</sup>,  
9 Barlafante G<sup>1,2</sup>

10  
11 1 EBOM – European Institute for Evidence Based Osteopathic Medicine, Chieti, Italy

12 2 AIOT – Accademia Italiana Osteopatia Tradizionale, Pescara, Italy.

13 3 Neonatal Intensive Care Unit - “Spirito Santo” Civil Hospital, Pescara, Italy.

14 4 Neonatal Intensive Care Unit - Macerata Public Hospital  
15  
16  
17

18 Corresponding author:

19 Francesco Cerritelli

20 Via Prati, 29 - 65124 Pescara (Italy)

21 tel +39 339 4332801 fax +39 085 4172587

22 [francesco.cerritelli@ebom.it](mailto:francesco.cerritelli@ebom.it)  
23  
24  
25  
26  
27  
28  
29  
30  
31  
32  
33  
34  
35  
36  
37  
38  
39  
40  
41  
42  
43  
44  
45  
46  
47  
48  
49  
50  
51  
52  
53  
54  
55  
56  
57  
58  
59  
60

## ABSTRACT

### Introduction

Neonatal care has been considered one of the first priorities for improving quality of life in children. In 2010 the 10% of babies were born prematurely influencing national health care policies, economic action plans and political decisions. The use of complementary medicine has been applied to the care of newborns. One previous study documented the positive effect of osteopathic manipulative treatment (OMT) in reducing newborns' length of stay (LOS). Aim of this multicentre randomized controlled trial is to examine the association between OMT and LOS across three NICUs.

### Methods and analysis

690 preterm infants will be recruited from three secondary and tertiary NICUs from north and central Italy and allocated into two groups, using permuted-block randomization. The two groups will receive standard medical care and OMT will be applied, twice a week, to the experimental group only. Outcome assessors will be blinded of study design and group allocation. The primary outcome is the mean difference in days between discharge and entry. Secondary outcomes are difference in daily weight gain, number of episodes of vomit, regurgitation, stooling, use of enema, time to full enteral feeding and NICU costs. Statistical analyses will take into account the intention-to-treat method. Missing data will be handled using last observation carried forward imputation technique.

### Ethics and dissemination

Written informed consent will be obtained from parents or legal guardians at study enrollment. The trial has been approved by the ethical committee of Macerata hospital (n°22/int./CEI/27239) and it is under review by the other regional ethics committees. Results from this trial will be disseminated through scientific medical journals and conferences.

### Trial registration

This trial has been registered at [www.clinicaltrials.org](http://www.clinicaltrials.org) (identifier NCT01645137).

1  
2  
3  
4 Article summary  
5

6 Article focus  
7

- 8 • Osteopathic treatment as a complementary and coadjuvant therapy in NICU  
9 • Effectiveness of osteopathic procedures in reducing the newborns' LOS  
10 • Osteopathy as a means to reduce NICU costs  
11

12 Key messages  
13

- 14 • Beneficial effects of osteopathic treatment on newborns health  
15 • Cost-effectiveness of osteopathic procedures in NICU settings  
16

17 Strengths and limitations of the study  
18

- 19 • Robust study design based on multicentre nationwide randomized control trial  
20 • Single blinding  
21  
22  
23  
24  
25  
26  
27  
28  
29  
30  
31  
32  
33  
34  
35  
36  
37  
38  
39  
40  
41  
42  
43  
44  
45  
46  
47  
48  
49  
50  
51  
52  
53  
54  
55  
56  
57  
58  
59  
60



## INTRODUCTION

Neonatal care has been one of the major focuses of the global health system policies, in terms of services delivered, to reduce neonatal mortality and morbidity. The last report of the WHO showed that more than 1 in 10 infants are born prematurely, resulting in 15 million premature infants worldwide in 2010<sup>1</sup>. In spite of expensive neonatal intensive care units (NICUs), structural changes in the health care system have led to evidence-based guidelines that reduce preterm infants hospitalization and deaths. A large rate of US pediatric hospital stays is secondary to neonatal conditions that rank among the most expensive items in the list of services provided for children<sup>2</sup>. The highest average cost per infant is for preterm newborns with gestational age (GA) between 24-31 weeks, followed by those between 32-36 weeks, as opposed to the general population<sup>3</sup>. Costs per surviving infant generally decrease with increasing GA. In the United States, preterm/LBW infants account for half the hospitalization costs of all newborns and one quarter of overall pediatric costs<sup>4</sup>. In Italy, the cost per infant per day ranged between €200 and €500 according to infants health conditions<sup>5</sup>.

Length of stay (LOS) in NICUs is strongly associated with GA and birth weight<sup>6</sup>. Infants delivered at the earliest GA have the longest hospital stays, partly because of the higher incidence of medical complications in very low birth weight (VLBW) infants. The Italian healthcare institute reported an average LOS per different diagnostic categories ranging from 4 to 34 days<sup>5</sup>.

However, compared to term infants, premature infants are unique in their need to attain not only medical stability but also physiologic maturity, including adequate temperature control, cessation of apnea and bradycardia, and adequate feeding behavior, before they are safely discharged to home<sup>7,8</sup>.

Patterns of hospitalization of preterm infants are also associated with the presence of clinical symptoms of abnormal gastrointestinal function such as vomit, regurgitation, gastric residuals and functional constipation<sup>9-11</sup>.

Osteopathy is a form of drug-free non-invasive manual medicine, designated as complementary and alternative medicine (CAM). It relies on manual contact for diagnosis and treatment<sup>12</sup>. It respects the relationship of body, mind and spirit in health and disease; it lays emphasis on the structural and functional integrity of the body and the body's intrinsic tendency for self-healing. Osteopathic practitioners use a wide variety of therapeutic manual techniques to improve physiological function and/or support homeostasis that has been altered by somatic (body framework) dysfunction (ICD-10-CM Diagnosis Code M99.00-09), i.e. impaired or altered function of related components of the somatic system; skeletal, arthrodial and myofascial structures; and related vascular, lymphatic, and neural elements<sup>13</sup>. Osteopathic practitioners use their understanding of the relationship between structure and function to optimize the body's self-regulating, self-healing capabilities. This holistic approach to patient care and healing is based on the concept that a human being is a dynamic functional unit, in which all parts are interrelated and which possesses its own self-regulatory and self-healing mechanisms. Two essential components of osteopathic health care are the structural evaluation of the patient for diagnosis and an array of manipulative techniques for treatment<sup>12</sup>.

1  
2 Aim of the structural examination is to locate somatic dysfunctions, while the array of  
3 manipulative techniques are used to relieve tissues tensions, improve blood flow and  
4 lymphatic drainage.

5 Although several studies document the effect of osteopathic manipulative treatment (OMT)  
6 in a population of pediatric patients<sup>14-16</sup>, the medical literature lacks information about any  
7 potential benefits of the use of OMT in preterm infants. The only study published  
8 demonstrated a potential positive effect of OMT in reducing the likelihood of excessive  
9 LOS and gastro-intestinal symptoms<sup>17</sup>.

10  
11  
12 Aim of this multicentre randomized controlled trial is to examine the association between  
13 OMT and LOS in a larger population.  
14  
15  
16  
17  
18  
19  
20  
21  
22  
23  
24  
25  
26  
27  
28  
29  
30  
31  
32  
33  
34  
35  
36  
37  
38  
39  
40  
41  
42  
43  
44  
45  
46  
47  
48  
49  
50  
51  
52  
53  
54  
55  
56  
57  
58  
59  
60

## METHODS AND ANALYSIS

### Aim of the study

Primary outcome is to evaluate the effectiveness of OMT in reducing LOS in a sample of premature infants.

Secondary outcome of the study is to evaluate the difference in daily weight gain, number of episodes of vomit and regurgitation, stooling, use of enema, time to full enteral feeding (nipple and/or bottle) and NICU costs.

### Study type

Interventional, multicentre nationwide single blinded randomized controlled trial. Preterm infants entering the trial will receive either routine medical care plus osteopathic evaluation and treatment or routine medical care plus osteopathic evaluation only (figure 1).

### Participating NICUs

Patients will be recruited from three Italian secondary and tertiary NICUs at the public hospital in Pescara, Macerata and Monza.

The three participating NICUs are located throughout Italy in urban regions with catchment areas of about 40 000 to 150 000 inhabitants. Principal investigators of the participating NICUs are neonatologists and osteopaths with at least 5 years of osteopathic treatments in NICU and specialized neonatal osteopathic education.

### Population

Participants who met the following inclusion criteria are considered eligible for the trial: male and female preterm infants entering the NICUs in the period between 1 July 2012 and 30 June 2013, preterms born in the same hospital of the referred NICU and free of medical complications and parents or legal guardian written informed consent.

Subjects presenting the following clinical conditions are excluded:

- gestational age <29 weeks
- gestational age >37 weeks
- first OMT performed after 14 days from birth
- genetic disorders
- congenital disorders
- cardiovascular abnormalities
- proven or suspected necrotized enterocolitis with or without gastrointestinal perforation
- proven or suspected abdominal obstruction
- pre/post surgery patients
- pneumoperitoneum
- atelectasis
- newborn from an HIV seropositive/drug addicted mother
- respiratory disorders
- transferred to/from other hospital
- admitted for preterminal comfort care (defined as neither intubation nor cardio-respiratory resuscitation)

### Randomization process

All patients entering the study are sequentially allocated to the experimental and control arms using R (R core team, Vienna, Austria), an open source statistical software, as computer random number generator<sup>18</sup>.

The type of randomization procedure is permuted-block (ratio 1:1).

The process of randomization is performed in the coordinating center.

### Research investigators

Investigators will be grouped into three groups:

1. “consultant performing the randomization”
2. “osteopaths performing the evaluation”
3. “osteopaths performing the evaluation&treatment”

#### *Consultant performing the randomization*

An information technology consultant will be responsible for randomization prior to the arrival of the osteopaths to the NICU.

#### *Osteopaths performing the evaluation*

Osteopaths in this group will perform the osteopathic evaluation in all infants entering the trial, with no knowledge about patients allocation.

The osteopathic evaluation will be performed in the absence of the “osteopaths performing the evaluation&treatment”.

#### *Osteopaths performing the evaluation&treatment*

“Osteopaths performing the evaluation&treatment” will perform an osteopathic evaluation and treatment of preterm infants from group “A”.

### Intervention provided into the trial

Patients from experimental and control groups will receive routine medical care.

After study enrollment, all patients are sampled in group A and group B.

1. Group A (OMT): patients under usual medical care plus osteopathic treatment.

Patients from this group will receive osteopathic care as follows: two treatments weekly for the entire length of stay in the unit. Patients from group A will also receive an osteopathic evaluation from the “osteopaths performing the evaluation”.

Osteopathic treatments will only be applied to patients from group A and will be performed only by the “osteopaths performing the evaluation&treatment”, not involved in the study design, data entry, statistical analysis.

Each OMT sessions involve the structural examination and specific manipulative procedures.

In newborns the structural exam is usually performed with the child lying down in the open crib or incubator. Diagnostic criteria for somatic dysfunction are focused on tissue texture abnormalities, areas of asymmetry and misalignment of bony landmarks and the quality of motion, its balance and organization.

1  
2 The second part of the OMT session is characterized by the use of a variety of therapeutic  
3 manual techniques, addressed to increase range of motion and resolve the somatic  
4 dysfunctions diagnosed.

5 Techniques to be used are in line with the benchmarks for osteopathic treatment available in  
6 the medical literature and are limited to myofascial release, balanced  
7 ligamentous/membranous tension, indirect fluidic and v-spread. The whole session will last  
8 30 minutes, 10 minutes for evaluation and 20 minutes for treatment.

## 11 2. Group B (No OMT): control group.

12 Following the same schedule as group A, patients from group B will receive usual medical  
13 care and osteopathic evaluation only. The osteopathic evaluation will last 10 minutes. To  
14 maintain blinding of NICU personnel, the following 20 minutes osteopaths will keep their  
15 position close to the incubator or bed without touching the infant.

16  
17  
18  
19 Osteopathic service will be provided twice a week, on Tuesdays and Fridays.

20  
21 In case of critical preterm's health conditions (i.e. acute infections, per-acute emergency  
22 care) or supplemental neonatal medical screening during the osteopathic service, the  
23 aforementioned intervention can be temporally stopped for a given trial participant. The  
24 infant will not be either evaluated or treated. This is in line with hospital safety procedures  
25 and primary care priority intervention.

## 26 27 28 **Allocation concealment and blinding**

29 NICU staff are unaware of study design and outcomes.

30 NICU staff are blinded to patients allocation, since all infants will be touched by osteopaths  
31 from group A and B

## 32 33 34 **Data entering and data export**

35 Data collection will be performed using an ad hoc locally developed software called  
36 EBOM-GCCN.

37 EBOM-GCCN data set is an informatics tool that improves the efficiency and accuracy of  
38 data and has been developed to assist neonatologists, nurses and osteopaths in daily patients  
39 management.

40  
41  
42 The software consists of three sections:

43 - Section 1: Intended for use by neonatologists and nurses for recording patients' general  
44 details and all clinical information;

45 - Section 2: Intended for use by "*osteopaths performing the evaluation&treatment*";

46 - Section 3: Intended for use by "*osteopaths performing the evaluation*".

47  
48 Records in section 1, 2 and 3 are exclusively and respectively accessible to NICU staff,  
49 "*osteopaths performing the evaluation&treatment*" and "*osteopaths performing the*  
50 *evaluation*".

51  
52 Nursing and medical records will be collected daily by the NICU staff, from the time the  
53 infants enters the unit to the time of discharge.

54  
55 Osteopathic records will be collected twice weekly when the osteopathic service will be  
56 provided. "*Osteopaths performing the evaluation&treatment*" will collect data in relation to  
57 the structural examination and the techniques applied, while the "*osteopaths performing the*  
58 *evaluation*" will only collect data for the structural examination.

1  
2  
3 Data export will take place at the end of the study by the statistician from the coordinating  
4 center European Institute for Evidence Based Osteopathic Medicine (EBOM).  
5  
6

### 7 **Measurements**

8 To evaluate the effect of the treatment, standard measurements will be recorded. Data will  
9 be collected at the baseline (entry time, T0), every time the osteopathic service is provided  
10 and at the end of the stay in the unit (discharge time, T1). An expected average period of 4  
11 weeks has been considered.  
12

13 The following measurements will be included for the primary and secondary outcomes.  
14

15 Primary outcome: length of stay (LOS)

16 LOS will be used as primary outcome and measured as the mean difference in days between  
17 T1 and T0.  
18

19 According to international guidelines, the following physiological conditions are required  
20 for discharge: maintenance of body heat at room temperature, coordinated sucking,  
21 swallowing, and breathing while feeding; sustained pattern of weight gain; stability of  
22 cardiorespiratory function (no episodes of apnea/bradycardia for 2-5 days, free of  
23 supplemental oxygen support)<sup>8</sup>.  
24  
25

26 Secondary outcomes

27 Secondary outcome measurements include the following parameters:

- 28 1. daily weight gain, referred as the net weight variation per day expressed in grams
- 29 2. episodes of vomit, the number of vomits per day
- 30 3. episodes of regurgitation, the number of regurgitations per day
- 31 4. episodes of stooling, the number of stools per day
- 32 5. use of enema, the number of enemas used per day
- 33 6. time to reach full enteral feeding, the number of days before autonomous feeding is  
34 achieved
- 35 7. NICU costs, calculated as NICU daily newborn expenses, according to local authorities,  
36 multiplied by the newborn's LOS. Costs will be estimated in euros per day
- 37 8. side effects of treatment (osteopathy and clinical procedures)  
38  
39  
40

41 In addition to these measurements, socio-demographic and clinical data will be collected  
42 and include:

- 43 1. newborn's data: gender, gestational age, weight at birth and at entry, height, head  
44 circumference at birth, route, type and length of delivery, diagnosis at T0 and T1,  
45 associated pathologies
- 46 2. mother's data: age, ethnicity, BMI, nationality, number of previous pregnancies, clinical  
47 medical condition during pregnancy, concurrent pathologies
- 48 3. father's data: age, ethnicity, BMI, nationality, concurrent pathologies  
49  
50  
51  
52

### 53 **Statistical analyses**

54 All calculations will be performed at the coordinating center EBOM.

55 Statistical analyses will take into account the intention-to-treat analysis. Missing data will  
56 be handled using last observation carried forward (LOCF) imputation technique. Arithmetic  
57 means and standard deviation will be used for the general characteristics of the study  
58  
59  
60



1  
2  
3  
4  
5  
6  
7  
8  
9  
10  
11  
12  
13  
14  
15  
16  
17  
18  
19  
20  
21  
22  
23  
24  
25  
26  
27  
28  
29  
30  
31  
32  
33  
34  
35  
36  
37  
38  
39  
40  
41  
42  
43  
44  
45  
46  
47  
48  
49  
50  
51  
52  
53  
54  
55  
56  
57  
58  
59  
60

population. Univariate statistical tests will be performed to compare the experimental group and control group at the baseline. A generalized linear model, linear regression, will be considered to study the independent effect of OMT on primary endpoint and secondary endpoints, taking into account all possible confounders. The significance level will be at  $\alpha=0.01$ . Differences between the groups will be presented as mean with 95% CI or in categories with OR for categorical data.

The statistical program in use for randomization and data analyses is R<sup>18</sup>.

### Sample size

Sample size calculation used an effect size of 0.3 calculated from previous studies, considering a mean difference of 4 days between experimental and control group and a SD of 14. The statistical power is set at 0.90 and an alpha level equal to 0.01. This produces a sample size of 333 per group. To prevent loss of power, the sample size is increased up to 345 subjects per group. The whole sample (N=690) is then divided, with a final result of N=230 preterm infants for each NICU. A longer period of study enrollment has been considered a strategy to achieve the estimated sample size.

### Coordinating center

The coordinating center EBOM consists of an executive division, President and Vice-President, an administration office, a group of researchers, an information technology consultant and a senior biostatistician.

The coordinating center collaborates with the A.I.O.T. - Accademia Italiana Osteopatia Tradizionale.

### ETHICS AND DISSEMINATION

During the routine initial post-delivery consultation, the neonatologist approaches parents or legal guardians explaining the patient information sheet. Written informed consent will be then obtained from the above-mentioned guardians at study enrollment. Participation is voluntary and data collected will be sent to the coordinating centre using an anonymous identification for each patient.

The trial is approved by the ethical committee of Macerata hospital (n°22/int./CEI/27239) and it is under review by the other regional ethics committees. Moreover the trial has been registered on clinicaltrial.gov (identifier NCT01645137).

The expected disadvantages for the intervention provided in the trial are null as well as no potential side effects due to osteopathic care are predicted as shown by the recent osteopathic literature<sup>19</sup>. However, any side effect will be recorded during the study period and appropriately discussed in the final paper.

### Publication policy

The results of the trial will be published in peer-reviewed journals and presented at relevant congresses. The trial will be reported in accordance with the CONSORT recommendations.

### DISCUSSION

The purpose of this multicentre single blinded RCT is to confirm the benefits of OMT in the care of preterm infants. In this trial, osteopathic care is not based on a predetermined protocol but on needs-based approach. Thus subjects can potentially be exposed to different

1 techniques, leading to inter-subjects and intra-subjects OMT variability. Nevertheless the  
2 objective is to provide evidence of the impact of osteopathic approach rather than the  
3 association with a given manual protocol.

4  
5 On the basis of quantitative data, the scope is to estimate the effect of OMT across different  
6 centers, proving generalizability on the effectiveness of osteopathy in NICUs. Well-  
7 designed researches are scarce in the osteopathic area, thus the present study will provide  
8 the most convincing evidence of relationship between exposure and effect.

9  
10 To the best of our knowledge, this will be the first study in osteopathy applied to infants  
11 using gold standards methods that include a randomized multicentre approach, a single hub  
12 computer-based data collection and a large sample size stratified by risk factors. In addition  
13 to this, the statistics that will be used will be aimed to consider different sources of  
14 variability, to allow reliable results for the effectiveness of OMT. Finally, the expected  
15 benefits for the intervention provided in the trial are shorter period of hospitalization and  
16 improvements in the secondary outcomes, leading to enhanced quality of health service  
17 delivered and cost reductions.  
18  
19

#### 20 21 Authors' contribution

22 CF, PG and BG conceptualized, designed and wrote the protocol. RC, D'IC, FP, PFP and  
23 TL review the protocol for important intellectual content. All authors read and approved the  
24 final manuscript.  
25

26  
27 Financial statement: This research received no specific grant from any funding agency in  
28 the public, commercial or not-for-profit sectors.  
29

30  
31 Conflict of interest: Authors declare no conflict of interest.  
32

#### 33 Acknowledgments

34 Authors would like to thank Accorsi Alessandro, Cozzolino Vincenzo, D'Orazio Marianna,  
35 Gualdi Stefano, Lupacchini Mariacristina and Marinelli Benedetta for their precious  
36 contribution.  
37  
38  
39  
40  
41  
42  
43  
44  
45  
46  
47  
48  
49  
50  
51  
52  
53  
54  
55  
56  
57  
58  
59  
60



## Bibliography

1. World Health Organization, March of Dimes, PMNCH, Save the Children. Born to soon: The Global Action Report on Preterm Birth. In: Eds CP Howson MK, JE Lawn, editor. Geneva: World Health Organization, 2012.
2. Owens PL TJ, Elixhauser A, Ryan K. Care of Children and Adolescents in U.S. Hospitals. In: 4 RHFBN, editor. *AHRQ Publication 04-0004*. Rockville, MD: Agency for Healthcare Research and Quality, 2003.
3. Clements KM, Barfield WD, Ayadi MF et al. Preterm birth-associated cost of early intervention services: an analysis by gestational age. *Pediatrics* 2007;119(4):e866-74.
4. Russell RB, Green NS, Steiner CA et al. Cost of hospitalization for preterm and low birth weight infants in the United States. *Pediatrics* 2007;120(1):e1-9.
5. Italian Ministry of Health. Rapporto annuale sull'attività di ricovero ospedaliero - dati SDO 2010. In. Roma: Ministero della salute; 2011.
6. Bakewell-Sachs S, Medoff-Cooper B, Escobar GJ et al. Infant functional status: the timing of physiologic maturation of premature infants. *Pediatrics* 2009;123(5):e878-86.
7. Eichenwald EC, Blackwell M, Lloyd JS et al. Inter-neonatal intensive care unit variation in discharge timing: influence of apnea and feeding management. *Pediatrics* 2001;108(4):928-33.
8. Hospital discharge of the high-risk neonate--proposed guidelines. American Academy of Pediatrics. Committee on Fetus and Newborn. *Pediatrics* 1998;102(2 Pt 1):411-7.
9. Mezzacappa MA, Rosa AC. Clinical predictors of abnormal esophageal pH monitoring in preterm infants. *Arg Gastroenterol* 2008;45(3):234-8.
10. Mihatsch WA, von Schoenaich P, Fahrenstich H et al. The significance of gastric residuals in the early enteral feeding advancement of extremely low birth weight infants. *Pediatrics* 2002;109(3):457-9.
11. Duman N, Utkutan S, Ozkan H et al. Are the stool characteristics of preterm infants affected by infant formulas? *Turk J Pediatr* 2000;42(2):138-44.
12. World Osteopathic Health Organization. WOHO. Osteopathic glossary, 2011.
13. American Association of Colleges of Osteopathic Medicine. Glossary of Osteopathic Terminology, 2002.
14. Hayden C, Mullinger B. A preliminary assessment of the impact of cranial osteopathy for the relief of infantile colic. *Complement Ther Clin Pract* 2006;12(2):83-90.
15. Vandenplas Y, Denayer E, Vandenbossche T et al. Osteopathy may decrease obstructive apnea in infants: a pilot study. *Osteopath Med Prim Care* 2008;2:8.
16. Philippi H, Faldum A, Schleupen A et al. Infantile postural asymmetry and osteopathic treatment: a randomized therapeutic trial. *Dev Med Child Neurol* 2006;48(1):5-9; discussion 4.
17. Pizzolorusso G, Turi P, Barlafante G et al. Effect of osteopathic manipulative treatment on gastrointestinal function and length of stay of preterm infants: an exploratory study. *Chiropractic & Manual Therapies* 2011;19(15).
18. R Development Core Team. R: A language and environment for statistical computing. *R Foundation for Statistical Computing*. Vienna, Austria., 2010.
19. Hayes NM, Bezilla TA. Incidence of iatrogenesis associated with osteopathic manipulative treatment of pediatric patients. *J Am Osteopath Assoc* 2006;106(10):605-8.

1  
2  
3 **EFFECTIVENESS OF OSTEOPATHIC MANIPULATIVE TREATMENT IN**  
4 **NEONATAL INTENSIVE CARE UNITS: PROTOCOL FOR A MULTICENTRE**  
5 **RANDOMIZED CLINICAL TRIAL**  
6

7  
8 Cerritelli F<sup>1,2</sup>, Pizzolorusso G<sup>1,2</sup>, Renzetti C<sup>2</sup>, D’Incecco C<sup>3</sup>, Fusilli P<sup>3</sup>, Perri FP<sup>4</sup>, Tubaldi L<sup>4</sup>,  
9 Barlafante G<sup>1,2</sup>

10  
11 1 EBOM – European Institute for Evidence Based Osteopathic Medicine, Chieti, Italy

12 2 AIOT – Accademia Italiana Osteopatia Tradizionale, Pescara, Italy.

13 3 Neonatal Intensive Care Unit - “Spirito Santo” Civil Hospital, Pescara, Italy.

14 4 Neonatal Intensive Care Unit - Macerata Public Hospital  
15  
16  
17

18 Corresponding author:

19 Francesco Cerritelli

20 Via Prati, 29 - 65124 Pescara (Italy)

21 tel +39 339 4332801 fax +39 085 4172587

22 [francesco.cerritelli@ebom.it](mailto:francesco.cerritelli@ebom.it)  
23  
24  
25  
26  
27  
28  
29  
30  
31  
32  
33  
34  
35  
36  
37  
38  
39  
40  
41  
42  
43  
44  
45  
46  
47  
48  
49  
50  
51  
52  
53  
54  
55  
56  
57  
58  
59  
60

## ABSTRACT

### Introduction

Neonatal care has been considered one of the first priorities for improving quality of life in children. In 2010 the 10% of babies were born prematurely influencing national health care policies, economic action plans and political decisions. The use of complementary medicine has been applied to the care of newborns. One previous study documented the positive effect of osteopathic manipulative treatment (OMT) in reducing newborns' length of stay (LOS). Aim of this multicentre randomized controlled trial is to examine the association between OMT and LOS across three NICUs.

### Methods and analysis

690 preterm infants will be recruited from three secondary and tertiary NICUs from north and central Italy and allocated into two groups, using permuted-block randomization. The two groups will receive standard medical care and OMT will be applied, twice a week, to the experimental group only. Outcome assessors will be blinded of study design and group allocation. The primary outcome is the mean difference in days between discharge and entry. Secondary outcomes are difference in daily weight gain, number of episodes of vomit, regurgitation, stooling, use of enema, time to full enteral feeding and NICU costs. Statistical analyses will take into account the intention-to-treat method. Missing data will be handled using last observation carried forward imputation technique.

### Ethics and dissemination

Written informed consent will be obtained from parents or legal guardians at study enrollment. The trial has been approved by the ethical committee of Macerata hospital (n°22/int./CEI/27239) and it is under review by the other regional ethics committees. Results from this trial will be disseminated through scientific medical journals and conferences.

### Trial registration

This trial has been registered at [www.clinicaltrials.org](http://www.clinicaltrials.org) (identifier NCT01645137).

1  
2  
3  
4 Article summary  
5

6 Article focus  
7

- 8 • Osteopathic treatment as a complementary and coadjuvant therapy in NICU
- 9 • Effectiveness of osteopathic procedures in reducing the newborns' LOS
- 10 • Osteopathy as a means to reduce NICU costs  
11

12 Key messages  
13

- 14 • Beneficial effects of osteopathic treatment on newborns health
- 15 • Cost-effectiveness of osteopathic procedures in NICU settings  
16

17 Strengths and limitations of the study  
18

- 19 • Robust study design based on multicentre nationwide randomized control trial
- 20 • Single blinding  
21  
22  
23  
24  
25  
26  
27  
28  
29  
30  
31  
32  
33  
34  
35  
36  
37  
38  
39  
40  
41  
42  
43  
44  
45  
46  
47  
48  
49  
50  
51  
52  
53  
54  
55  
56  
57  
58  
59  
60

## INTRODUCTION

Neonatal care has been one of the major focuses of the global health system policies, in terms of services delivered, to reduce neonatal mortality and morbidity. The last report of the WHO showed that more than 1 in 10 infants are born prematurely, resulting in 15 million premature infants worldwide in 2010<sup>1</sup>. In spite of expensive neonatal intensive care units (NICUs), structural changes in the health care system have led to evidence-based guidelines that reduce preterm infants hospitalization and deaths. A large rate of US pediatric hospital stays is secondary to neonatal conditions that rank among the most expensive items in the list of services provided for children<sup>2</sup>. The highest average cost per infant is for preterm newborns with gestational age (GA) between 24-31 weeks, followed by those between 32-36 weeks, as opposed to the general population<sup>3</sup>. Costs per surviving infant generally decrease with increasing GA. In the United States, preterm/LBW infants account for half the hospitalization costs of all newborns and one quarter of overall pediatric costs<sup>4</sup>. In Italy, the cost per infant per day ranged between €200 and €500 according to infants health conditions<sup>5</sup>.

Length of stay (LOS) in NICUs is strongly associated with GA and birth weight<sup>6</sup>. Infants delivered at the earliest GA have the longest hospital stays, partly because of the higher incidence of medical complications in very low birth weight (VLBW) infants. The Italian healthcare institute reported an average LOS per different diagnostic categories ranging from 4 to 34 days<sup>5</sup>.

However, compared to term infants, premature infants are unique in their need to attain not only medical stability but also physiologic maturity, including adequate temperature control, cessation of apnea and bradycardia, and adequate feeding behavior, before they are safely discharged to home<sup>7,8</sup>.

Patterns of hospitalization of preterm infants are also associated with the presence of clinical symptoms of abnormal gastrointestinal function such as vomit, regurgitation, gastric residuals and functional constipation<sup>9-11</sup>.

Osteopathy is a form of drug-free non-invasive manual medicine, designated as complementary and alternative medicine (CAM). It relies on manual contact for diagnosis and treatment<sup>12</sup>. It respects the relationship of body, mind and spirit in health and disease; it lays emphasis on the structural and functional integrity of the body and the body's intrinsic tendency for self-healing. Osteopathic practitioners use a wide variety of therapeutic manual techniques to improve physiological function and/or support homeostasis that has been altered by somatic (body framework) dysfunction (ICD-10-CM Diagnosis Code M99.00-09), i.e. impaired or altered function of related components of the somatic system; skeletal, arthrodial and myofascial structures; and related vascular, lymphatic, and neural elements<sup>13</sup>. Osteopathic practitioners use their understanding of the relationship between structure and function to optimize the body's self-regulating, self-healing capabilities. This holistic approach to patient care and healing is based on the concept that a human being is a dynamic functional unit, in which all parts are interrelated and which possesses its own self-regulatory and self-healing mechanisms. Two essential components of osteopathic health care are the structural evaluation of the patient for diagnosis and an array of manipulative techniques for treatment<sup>12</sup>.

1  
2 Aim of the structural examination is to locate somatic dysfunctions, while the array of  
3 manipulative techniques are used to relieve tissues tensions, improve blood flow and  
4 lymphatic drainage.

5 Although several studies document the effect of osteopathic manipulative treatment (OMT)  
6 in a population of pediatric patients<sup>14-16</sup>, the medical literature lacks information about any  
7 potential benefits of the use of OMT in preterm infants. The only study published  
8 demonstrated a potential positive effect of OMT in reducing the likelihood of excessive  
9 LOS and gastro-intestinal symptoms<sup>17</sup>.

10  
11  
12 Aim of this multicentre randomized controlled trial is to examine the association between  
13 OMT and LOS in a larger population.  
14  
15  
16  
17  
18  
19  
20  
21  
22  
23  
24  
25  
26  
27  
28  
29  
30  
31  
32  
33  
34  
35  
36  
37  
38  
39  
40  
41  
42  
43  
44  
45  
46  
47  
48  
49  
50  
51  
52  
53  
54  
55  
56  
57  
58  
59  
60

## METHODS AND ANALYSIS

### Aim of the study

Primary outcome is to evaluate the effectiveness of OMT in reducing LOS in a sample of premature infants.

Secondary outcome of the study is to evaluate the difference in daily weight gain, number of episodes of vomit and regurgitation, stooling, use of enema, time to full enteral feeding (nipple and/or bottle) and NICU costs.

### Study type

Interventional, multicentre nationwide single blinded randomized controlled trial. Preterm infants entering the trial will receive either routine medical care plus osteopathic evaluation and treatment or routine medical care plus osteopathic evaluation only (figure 1).

### Participating NICUs

Patients will be recruited from three Italian secondary and tertiary NICUs at the public hospital in Pescara, Macerata and Monza.

The three participating NICUs are located throughout Italy in urban regions with catchment areas of about 40 000 to 150 000 inhabitants. Principal investigators of the participating NICUs are neonatologists and osteopaths with at least 5 years of osteopathic treatments in NICU and specialized neonatal osteopathic education.

### Population

Participants who met the following inclusion criteria are considered eligible for the trial: male and female All patients preterm infants entering the NICUs in the period between 1 July 2012 and 30 June July 2013, preterms born in the same hospital of the referred NICU and free of medical complications and parents or legal guardian written informed consent.  
~~are eligible to be enrolled in the trial. Inclusion criteria comprehend: male and female premature infants born in the same hospital of the referred NICU, preemies free of medical complications and parents or legal guardian written informed consent.~~

Subjects presenting the following clinical conditions are excluded:

- gestational age <29 weeks
- gestational age >37 weeks
- first OMT performed after 14 days from birth
- genetic disorders
- congenital disorders
- cardiovascular abnormalities
- proven or suspected necrotized enterocolitis with or without gastrointestinal perforation
- proven or suspected abdominal obstruction
- pre/post surgery patients
- pneumoperitoneum
- atelectasis
- newborn from an HIV seropositive/drug addicted mother
- respiratory disorders
- transferred to/from other hospital



- admitted for preterminal comfort care (defined as neither intubation nor cardio-respiratory resuscitation)

### **Randomization process**

All patients entering the study are sequentially allocated to the experimental and control arms using R (R core team, Vienna, Austria), an open source statistical software, as computer random number generator<sup>18</sup>.

The type of randomization procedure is permuted-block (ratio 1:1).

The process of randomization is performed in the coordinating center.

### **Research investigators**

Investigators will be grouped into three groups:

1. “consultant performing the randomization”
2. “osteopaths performing the evaluation”
3. “osteopaths performing the evaluation&treatment”

#### *Consultant performing the randomization*

An information technology consultant will be responsible for randomization prior to the arrival of the osteopaths to the NICU.

#### *Osteopaths performing the evaluation*

Osteopaths in this group will perform the osteopathic evaluation in all infants entering the trial, with no knowledge about patients allocation.

The osteopathic evaluation will be performed in the absence of the “osteopaths performing the evaluation&treatment”.

#### *Osteopaths performing the evaluation&treatment*

“Osteopaths performing the evaluation&treatment” will perform an osteopathic evaluation and treatment of preterm infants from group “A”.

### **Intervention provided into the trial**

Patients from experimental and control groups will receive routine medical care.

After study enrollment, all patients are sampled in group A and group B.

1. Group A (OMT): patients under usual medical care plus osteopathic treatment.

Patients from this group will receive osteopathic care as follows: two treatments weekly for the entire length of stay in the unit. Patients from group A will also receive an osteopathic evaluation from the “osteopaths performing the evaluation”.

Osteopathic treatments will only be applied to patients from group A and will be performed only by the “osteopaths performing the evaluation&treatment”, not involved in the study design, data entry, statistical analysis.

Each OMT sessions involve the structural examination and specific manipulative procedures.



1  
2 In newborns the structural exam is usually performed with the child lying down in the open  
3 crib or incubator. Diagnostic criteria for somatic dysfunction are focused on tissue texture  
4 abnormalities, areas of asymmetry and misalignment of bony landmarks and the quality of  
5 motion, its balance and organization.

6  
7 The second part of the OMT session is characterized by the use of a variety of therapeutic  
8 manual techniques, addressed to increase range of motion and resolve the somatic  
9 dysfunctions diagnosed.

10 Techniques to be used are in line with the benchmarks for osteopathic treatment available in  
11 the medical literature and are limited to myofascial release, balanced  
12 ligamentous/membranous tension, indirect fluidic and v-spread. The whole session will last  
13 30 minutes, 10 minutes for evaluation and 20 minutes for treatment.  
14  
15

## 16 2. Group B (No OMT): control group.

17 Following the same schedule as group A, patients from group B will receive usual medical  
18 care and osteopathic evaluation only. The osteopathic evaluation will last 10 minutes. To  
19 maintain blinding of NICU personnel, the following 20 minutes osteopaths will keep their  
20 position close to the incubator or bed without touching the infant.  
21  
22

23 Osteopathic service will be provided twice a week, on Tuesdays and Fridays.  
24  
25

26 In case of critical preemie/preterm's health conditions (i.e. acute infections, per-acute  
27 emergency care) or supplemental neonatal medical screening during the osteopathic service,  
28 the aforementioned intervention can be temporally stopped for a given trial participant. The  
29 infant will not be either evaluated or treated. This is in line with hospital safety procedures  
30 and primary care priority intervention.  
31  
32

### 33 **Allocation concealment and blinding**

34 NICU staff are unaware of study design and outcomes.

35 NICU staff are blinded to patients allocation, since all infants will be touched by osteopaths  
36 from group A and B  
37  
38

### 39 **Data entering and data export**

40 Data collection will be performed using an ad hoc locally developed software called  
41 EBOM-GCCN.

42 EBOM-GCCN data set is an informatics tool that improves the efficiency and accuracy of  
43 data and has been developed to assist neonatologists, nurses and osteopaths in daily patients  
44 management.  
45  
46

47 The software consists of three sections:

- 48 - Section 1: Intended for use by neonatologists and nurses for recording patients' general  
49 details and all clinical information;
- 50 - Section 2: Intended for use by "*osteopaths performing the evaluation&treatment*";
- 51 - Section 3: Intended for use by "*osteopaths performing the evaluation*".

52 Records in section 1, 2 and 3 are exclusively and respectively accessible to NICU staff,  
53 "*osteopaths performing the evaluation&treatment*" and "*osteopaths performing the*  
54 *evaluation*".  
55

56 Nursing and medical records will be collected daily by the NICU staff, from the time the  
57 infants enters the unit to the time of discharge.  
58  
59  
60

Osteopathic records will be collected twice weekly when the osteopathic service will be provided. “*Osteopaths performing the evaluation&treatment*” will collect data in relation to the structural examination and the techniques applied, while the “*osteopaths performing the evaluation*” will only collect data for the structural examination.

Data export will take place at the end of the study by the statistician from the coordinating center European Institute for Evidence Based Osteopathic Medicine (EBOM).

### Measurements

To evaluate the effect of the treatment, standard measurements will be recorded. Data will be collected at the baseline (entry time, T0), every time the osteopathic service is provided and at the end of the stay in the unit (discharge time, T1). An expected average period of 4 weeks has been considered.

The following measurements will be included for the primary and secondary outcomes.

Primary outcome: length of stay (LOS)

LOS will be used as primary outcome and measured as the mean difference in days between T1 and T0.

According to international guidelines, the following physiological conditions are required for discharge: maintenance of body heat at room temperature, coordinated sucking, swallowing, and breathing while feeding; sustained pattern of weight gain; stability of cardiorespiratory function (no episodes of apnea/bradycardia for 2-5 days, free of supplemental oxygen support)<sup>8</sup>.

Secondary outcomes

Secondary outcome measurements include the following parameters:

1. daily weight gain, referred as the net weight variation per day expressed in grams
2. episodes of vomit, the number of vomits per day
3. episodes of regurgitation, the number of regurgitations per day
4. episodes of stooling, the number of stools per day
5. use of enema, the number of enemas used per day
6. time to reach full enteral feeding, the number of days before autonomous feeding is achieved
7. NICU costs, calculated as NICU daily newborn expenses, according to local authorities, multiplied by the newborn's LOS. Costs will be estimated in euros per day
8. side effects of treatment (osteopathy and clinical procedures)

In addition to these measurements, socio-demographic and clinical data will be collected and include:

1. newborn's data: gender, gestational age, weight at birth and at entry, height, head circumference at birth, route, type and length of delivery, diagnosis at T0 and T1, associated pathologies
2. mother's data: age, ethnicity, BMI, nationality, number of previous pregnancies, clinical medical condition during pregnancy, concurrent pathologies
3. father's data: age, ethnicity, BMI, nationality, concurrent pathologies

### Statistical analyses

1 All calculations will be performed at the coordinating center EBOM.  
2  
3 Statistical analyses will take into account the intention-to-treat analysis. Missing data will  
4 be handled using last observation carried forward (LOCF) imputation technique. Arithmetic  
5 means and standard deviation will be used for the general characteristics of the study  
6 population. Univariate statistical tests will be performed to compare the experimental group  
7 and control group at the baseline. A generalized linear model, linear regression, will be  
8 considered to study the independent effect of OMT on primary endpoint and secondary  
9 endpoints, taking into account all possible confounders. The significance level will be at  
10  $\alpha=0.01$ . Differences between the groups will be presented as mean with 95% CI or in  
11 categories with OR for categorical data.  
12

13  
14 The statistical program in use for randomization and data analyses is R<sup>18</sup>.  
15

### 16 **Sample size**

17 Sample size calculation used an effect size of 0.3 calculated from previous studies,  
18 considering a mean difference of 4 days between experimental and control group and a SD  
19 of 14. The statistical power is set at 0.90 and an alfa level equal to 0.01. This produces a  
20 sample size of 333 per group. To prevent loss of power, the sample size is increased up to  
21 345 subjects per group. The whole sample (N=690) is then divided, with a final result of  
22 N=230 preterm infants for each NICU. A longer period of study enrollment has been  
23 considered a strategy to achieve the estimated sample size.  
24  
25

### 26 **Coordinating center**

27 The coordinating center EBOM consists of an executive division, President and Vice-  
28 President, an administration office, a group of researchers, an information technology  
29 consultant and a senior biostatistician.  
30  
31

32  
33 The coordinating center collaborates with the A.I.O.T. - Accademia Italiana Osteopatia  
34 Tradizionale.  
35  
36

### 37 **ETHICS AND DISSEMINATION**

38 During the routine initial post-delivery consultation, the neonatologist approaches parents or  
39 legal guardians explaining the patient information sheet. Written informed consent will be  
40 then obtained from the above-mentioned guardians at study enrollment. Participation is  
41 voluntary and data collected will be sent to the coordinating centre using an anonymous  
42 identification for each patient.  
43

44  
45 The trial is approved by the ethical committee of Macerata hospital (n°22/int./CEI/27239)  
46 and it is under review by the other regional ethics committees. Moreover the trial has been  
47 registered on clinicaltrial.gov (identifier NCT01645137).  
48

49 The expected disadvantages for the intervention provided in the trial are null as well as no  
50 potential side effects due to osteopathic care are predicted as shown by the recent  
51 osteopathic literature<sup>19</sup>. However, any side effect will be recorded during the study period  
52 and appropriately discussed in the final paper.  
53

### 54 **Publication policy**

55 The results of the trial will be published in peer-reviewed journals and presented at relevant  
56 congresses. The trial will be reported in accordance with the CONSORT recommendations.  
57  
58  
59  
60

## DISCUSSION

The purpose of this multicentre single blinded RCT is to confirm the benefits of OMT in the care of preterm infants. In this trial, osteopathic care is not based on a predetermined protocol but on needs-based approach. Thus subjects can potentially be exposed to different techniques, leading to inter-subjects and intra-subjects OMT variability. Nevertheless the objective is to provide evidence of the impact of osteopathic approach rather than the association with a given manual protocol.

On the basis of quantitative data, the scope is to estimate the effect of OMT across different centers, proving generalizability on the effectiveness of osteopathy in NICUs. Well-designed researches are scarce in the osteopathic area, thus the present study will provide the most convincing evidence of relationship between exposure and effect.

To the best of our knowledge, this will be the first study in osteopathy applied to infants using gold standards methods that include a randomized multicentre approach, a single hub computer-based data collection and a large sample size stratified by risk factors. In addition to this, the statistics that will be used will be aimed to consider different sources of variability, to allow reliable results for the effectiveness of OMT. Finally, the expected benefits for the intervention provided in the trial are shorter period of hospitalization and improvements in the secondary outcomes, leading to enhanced quality of health service delivered and cost reductions.

### Authors' contribution

CF, PG and BG conceptualized, designed and wrote the protocol. RC, D'IC, FP, PFP and TL review the protocol for important intellectual content. All authors read and approved the final manuscript.

Financial statement: This research received no specific grant from any funding agency in the public, commercial or not-for-profit sectors.

Conflict of interest: Authors declare no conflict of interest.

### Acknowledgments

Authors would like to thank Accorsi Alessandro, Cozzolino Vincenzo, D'Orazio Marianna, Gualdi Stefano, Lupacchini Mariacristina and Marinelli Benedetta for their precious contribution.

## Bibliography

1. World Health Organization, March of Dimes, PMNCH, Save the Children. Born to soon: The Global Action Report on Preterm Birth. In: Eds CP Howson MK, JE Lawn, editor. Geneva: World Health Organization, 2012.
2. Owens PL TJ, Elixhauser A, Ryan K. Care of Children and Adolescents in U.S. Hospitals. In: 4 RHFBN, editor. *AHRQ Publication 04-0004*. Rockville, MD: Agency for Healthcare Research and Quality, 2003.
3. Clements KM, Barfield WD, Ayadi MF et al. Preterm birth-associated cost of early intervention services: an analysis by gestational age. *Pediatrics* 2007;119(4):e866-74.
4. Russell RB, Green NS, Steiner CA et al. Cost of hospitalization for preterm and low birth weight infants in the United States. *Pediatrics* 2007;120(1):e1-9.
5. Italian Ministry of Health. Rapporto annuale sull'attività di ricovero ospedaliero - dati SDO 2010. In. Roma: Ministero della salute; 2011.
6. Bakewell-Sachs S, Medoff-Cooper B, Escobar GJ et al. Infant functional status: the timing of physiologic maturation of premature infants. *Pediatrics* 2009;123(5):e878-86.
7. Eichenwald EC, Blackwell M, Lloyd JS et al. Inter-neonatal intensive care unit variation in discharge timing: influence of apnea and feeding management. *Pediatrics* 2001;108(4):928-33.
8. Hospital discharge of the high-risk neonate--proposed guidelines. American Academy of Pediatrics. Committee on Fetus and Newborn. *Pediatrics* 1998;102(2 Pt 1):411-7.
9. Mezzacappa MA, Rosa AC. Clinical predictors of abnormal esophageal pH monitoring in preterm infants. *Arg Gastroenterol* 2008;45(3):234-8.
10. Mihatsch WA, von Schoenaich P, Fahrenstich H et al. The significance of gastric residuals in the early enteral feeding advancement of extremely low birth weight infants. *Pediatrics* 2002;109(3):457-9.
11. Duman N, Utkutan S, Ozkan H et al. Are the stool characteristics of preterm infants affected by infant formulas? *Turk J Pediatr* 2000;42(2):138-44.
12. World Osteopathic Health Organization. WOHO. Osteopathic glossary, 2011.
13. American Association of Colleges of Osteopathic Medicine. Glossary of Osteopathic Terminology, 2002.
14. Hayden C, Mullinger B. A preliminary assessment of the impact of cranial osteopathy for the relief of infantile colic. *Complement Ther Clin Pract* 2006;12(2):83-90.
15. Vandenplas Y, Denayer E, Vandenbossche T et al. Osteopathy may decrease obstructive apnea in infants: a pilot study. *Osteopath Med Prim Care* 2008;2:8.
16. Philippi H, Faldum A, Schleupen A et al. Infantile postural asymmetry and osteopathic treatment: a randomized therapeutic trial. *Dev Med Child Neurol* 2006;48(1):5-9; discussion 4.
17. Pizzolorusso G, Turi P, Barlafante G et al. Effect of osteopathic manipulative treatment on gastrointestinal function and length of stay of preterm infants: an exploratory study. *Chiropractic & Manual Therapies* 2011;19(15).
18. R Development Core Team. R: A language and environment for statistical computing. *R Foundation for Statistical Computing*. Vienna, Austria., 2010.
19. Hayes NM, Bezilla TA. Incidence of iatrogenesis associated with osteopathic manipulative treatment of pediatric patients. *J Am Osteopath Assoc* 2006;106(10):605-8.

1  
2  
3  
4  
5  
6  
7  
8  
9  
10  
11  
12  
13  
14  
15  
16  
17  
18  
19  
20  
21  
22  
23  
24  
25  
26  
27  
28  
29  
30  
31  
32  
33  
34  
35  
36  
37  
38  
39  
40  
41  
42  
43  
44  
45  
46  
47  
48  
49  
50  
51  
52  
53  
54  
55  
56  
57  
58  
59  
60

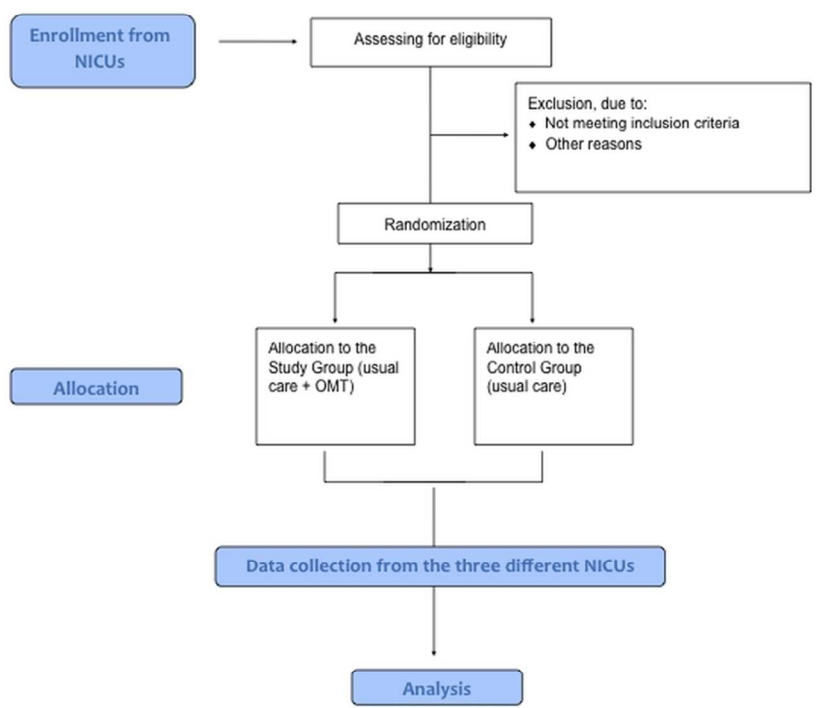

Figure 1. Flow chart describing recruitment, randomization, data collection and analysis of the study.

Flow chart describing recruitment, randomisation, data collection and analysis of the study.  
90x116mm (300 x 300 DPI)
